# Supplementary material for: Mechanistic insight into the self-coupling of 5-hydroxymethyl furfural to C12 fuel intermediate catalyzed by ionic liquids
Source: Royal Society of Chemistry journal article supplement (doi:10.1039/c9ra00827f), 2019-01-01
Supplement: c9ra00827f1.pdf [file c9ra00827f1.pdf]

**Electronic Supplementary Information**

**Mechanistic insight into the self-coupling of 5-hydroxymethyl furfural to C<sub>12</sub> fuel  
intermediate catalyzed by ionic liquids**

Jingjing Li,<sup>\*a</sup> Binfen Wang,<sup>a</sup> Yefan Dou<sup>a</sup> and Yiying Yang<sup>b</sup>

<sup>a</sup>College of Arts and Sciences, Shanxi Agricultural University, Taigu Shanxi, 030801,  
P. R. China

<sup>b</sup>Key Lab of Colloid and Interface Chemistry, Ministry of Education, Institute of  
Theoretical Chemistry, Shandong University, Jinan, 250100, P. R. China

E-mail: jjljsxau@qq.com

## Contents

|                                                     |    |
|-----------------------------------------------------|----|
| 1. Additional Computational Results.....            | S3 |
| 2. Cartesian Coordinates of All the Structures..... | S6 |

## 1. Additional Computational Results

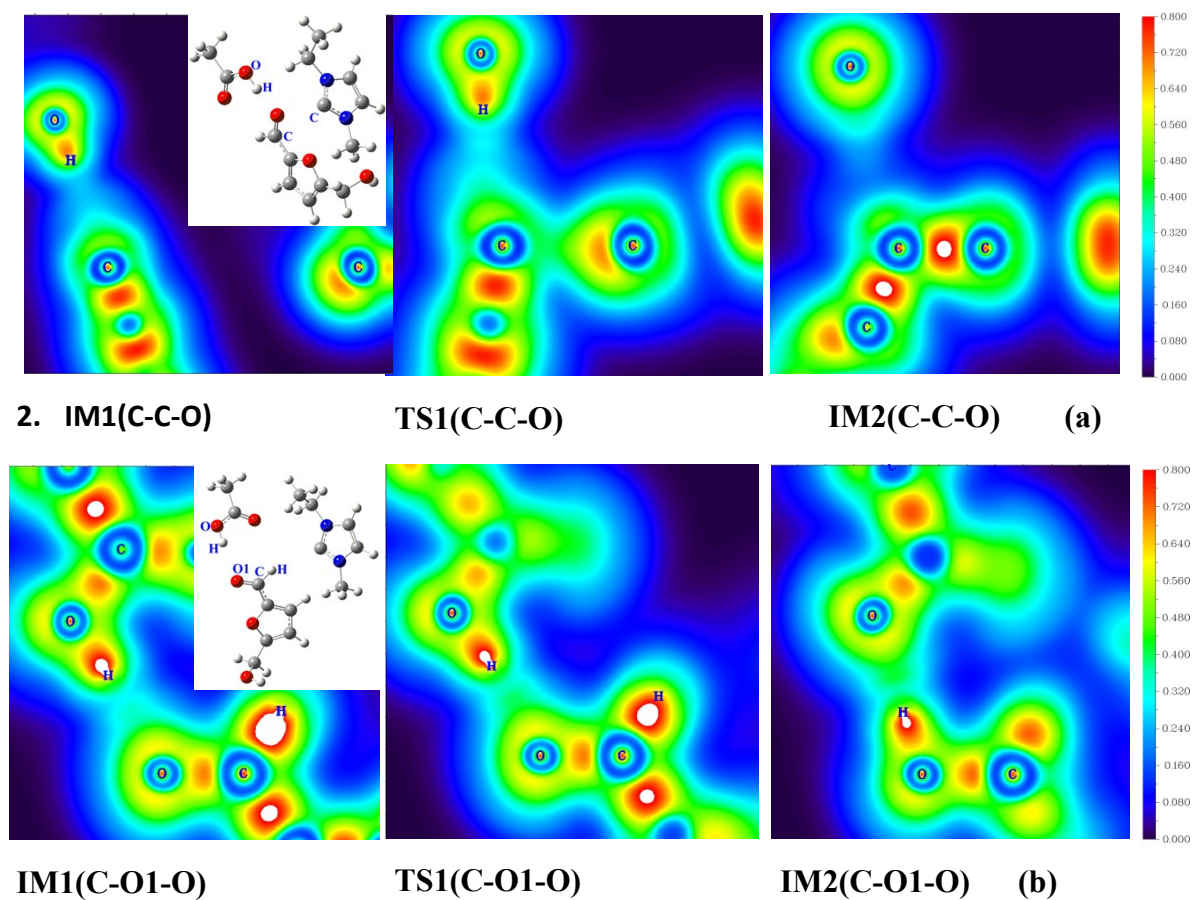

**Fig. S1** Localized orbital locator (LOL) profiles of **IM1**, **TS1** and **IM2** along (a) the C-C-O plane and (b) C-O1-O plane.

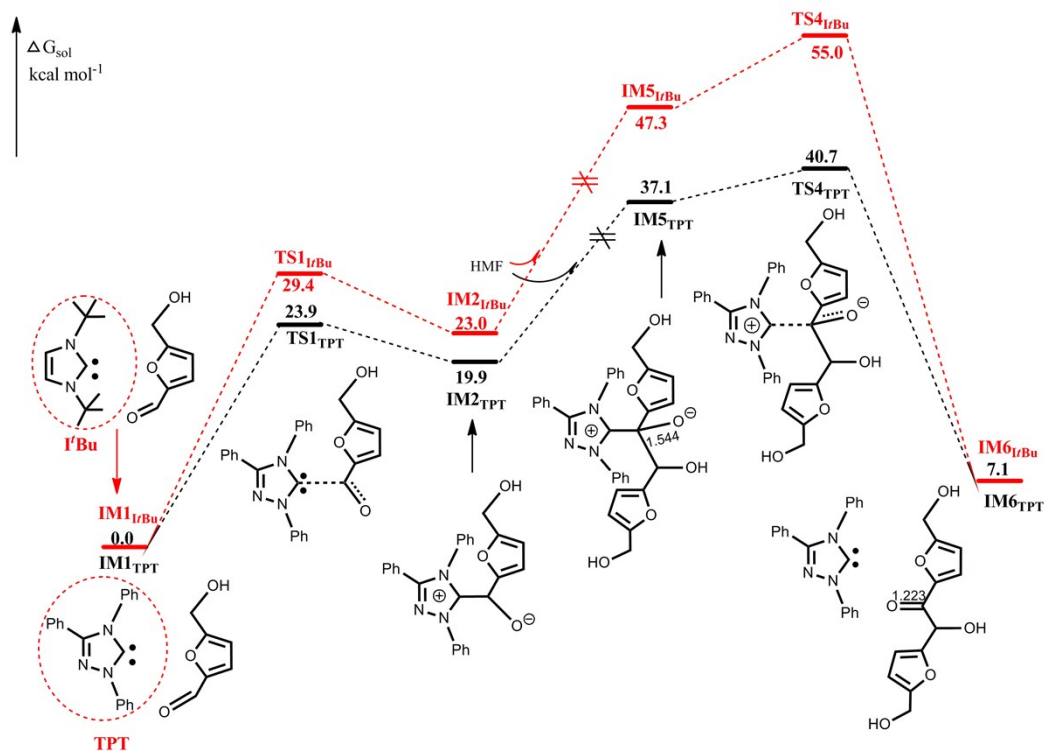

Fig. S2 Calculated free energy profiles with schematic structures for the first nucleophilic attack and last rate-determining step catalyzed by TPT (black line) and tBu (red line). The symbol  $\times$  denotes the pathway for the conversion from IM2<sub>TPT</sub> (IM2<sub>tBu</sub>) to IM5<sub>TPT</sub> (IM5<sub>tBu</sub>) has been omitted.

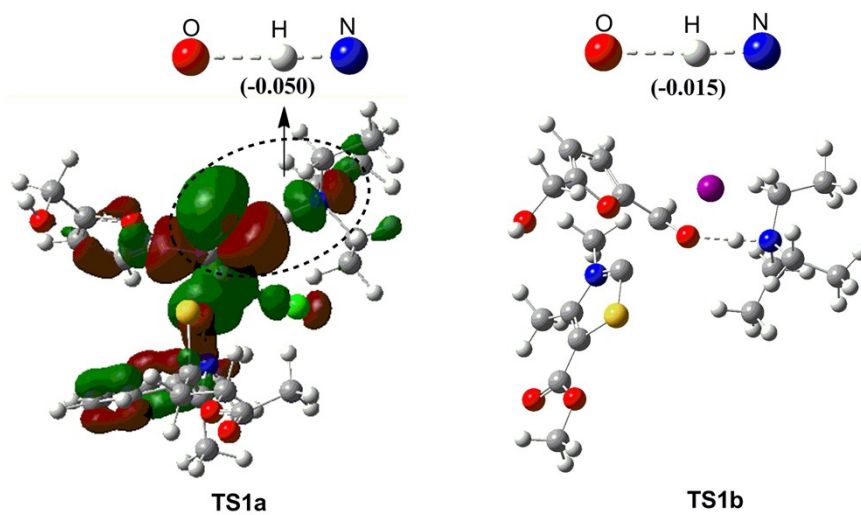

Fig. S3 Molecular orbital involving in 3c-4e bonding in **TS1a** and M-CBO (in brackets) of **TS1a** and **TS1b** (the molecular orbital of such a 3c-4e bond is absent in **TS1b**).

## 2. Cartesian Coordinates of All the Structures

### IM1

|   |              |              |              |
|---|--------------|--------------|--------------|
| O | 1. 67768600  | 3. 76711700  | -1. 34525100 |
| H | 2. 33686800  | 3. 42238200  | -0. 72737900 |
| C | -0. 08743900 | 3. 48975400  | 0. 31105300  |
| C | -0. 10837200 | 3. 35275700  | 1. 67681500  |
| H | 0. 44036300  | 3. 95737800  | 2. 38198000  |
| C | -0. 98010200 | 2. 27336600  | 1. 95771500  |
| C | -2. 34525000 | 0. 74851300  | 0. 44161900  |
| H | -2. 72894300 | 0. 21555400  | 1. 32435000  |
| C | -1. 43802300 | 1. 81621600  | 0. 74277400  |
| O | -0. 89205700 | 2. 56433500  | -0. 26698100 |
| O | -2. 69769900 | 0. 42119300  | -0. 69281100 |
| C | 0. 65202300  | 4. 42067700  | -0. 58880000 |
| H | 1. 06303300  | 5. 23303100  | 0. 01826600  |
| H | -1. 24552900 | 1. 86998800  | 2. 92331700  |
| H | -0. 03125800 | 4. 85143800  | -1. 32347700 |
| C | 3. 78481600  | -2. 66186700 | -0. 90104900 |
| C | 4. 45490000  | -2. 86012100 | 0. 26114500  |
| C | 2. 90270500  | -1. 22483200 | 0. 64296000  |
| N | 2. 84895600  | -1. 66766500 | -0. 64617200 |
| H | 3. 88837500  | -3. 13854900 | -1. 86217600 |
| H | 5. 25222000  | -3. 54193100 | 0. 50889400  |
| N | 3. 90338600  | -1. 97848800 | 1. 18148900  |
| C | 1. 92351800  | -1. 14443600 | -1. 65718500 |
| C | 2. 60776400  | -0. 25073400 | -2. 68775200 |
| H | 1. 15545000  | -0. 58968300 | -1. 11860000 |
| H | 1. 44082700  | -1. 99390300 | -2. 14775000 |
| H | 3. 07575600  | 0. 61295200  | -2. 20784100 |
| H | 1. 86755600  | 0. 11761200  | -3. 40363500 |
| C | 4. 34943700  | -1. 88003200 | 2. 56615700  |
| H | 3. 72111900  | -1. 15458600 | 3. 07917800  |
| H | 4. 25955600  | -2. 84777900 | 3. 06481800  |
| H | 5. 39012500  | -1. 55045100 | 2. 61090400  |
| H | 3. 37539900  | -0. 79425800 | -3. 24561300 |
| H | -3. 79931100 | -0. 85609500 | -0. 87401200 |
| C | -5. 89415300 | -3. 22899100 | -0. 18674600 |
| H | -5. 38515800 | -4. 04179100 | -0. 71192500 |
| H | -6. 71160000 | -2. 88724300 | -0. 82682100 |
| H | -6. 29222100 | -3. 59530800 | 0. 75769300  |
| C | -4. 92900300 | -2. 10339300 | 0. 05797400  |
| O | -4. 43741300 | -1. 59475800 | -1. 07649200 |
| O | -4. 61251100 | -1. 68875600 | 1. 15809900  |

**TS1**

|   |             |             |             |
|---|-------------|-------------|-------------|
| O | -4.92055800 | -0.08802800 | -1.04147700 |
| H | -5.11918200 | 0.43312900  | -0.25204800 |
| C | -3.33681400 | -1.44031200 | 0.24508900  |
| C | -3.15325400 | -1.67373600 | 1.57864800  |
| H | -3.92753700 | -1.91332200 | 2.29172300  |
| C | -1.75273800 | -1.54822400 | 1.82586500  |
| C | 0.23123800  | -1.05583500 | 0.24729600  |
| H | 0.91804700  | -1.13416100 | 1.09515800  |
| C | -1.17515800 | -1.24336000 | 0.62452300  |
| O | -2.13108500 | -1.18411800 | -0.34684900 |
| O | 0.63036000  | -1.29346600 | -0.91754400 |
| C | -4.54783200 | -1.41068500 | -0.61837600 |
| H | -5.36912500 | -1.89133800 | -0.07723000 |
| H | -1.23730300 | -1.67241600 | 2.76598800  |
| H | -4.37194300 | -1.97072900 | -1.53914600 |
| C | 0.90546700  | 3.34620000  | -0.12052200 |
| C | 1.20262000  | 3.23081100  | 1.19721900  |
| C | 0.40170600  | 1.22443400  | 0.50293300  |
| N | 0.41930900  | 2.10950900  | -0.52475100 |
| H | 0.99996000  | 4.18246900  | -0.79359500 |
| H | 1.60758500  | 3.94385600  | 1.89656400  |
| N | 0.88813500  | 1.92702300  | 1.55732100  |
| C | -0.04599200 | 1.81588100  | -1.88859100 |
| C | -1.38697100 | 2.47185600  | -2.20298800 |
| H | -0.11099900 | 0.73253300  | -1.97042300 |
| H | 0.72341900  | 2.16137800  | -2.58353500 |
| H | -2.16316600 | 2.12343500  | -1.51706600 |
| H | -1.69135300 | 2.21226200  | -3.22080500 |
| C | 1.05257200  | 1.40266800  | 2.90975600  |
| H | 0.83589200  | 0.33737000  | 2.90414800  |
| H | 2.07864400  | 1.55695800  | 3.24798400  |
| H | 0.36718200  | 1.90479400  | 3.59583500  |
| H | -1.32682800 | 3.56168500  | -2.13645900 |
| H | 2.18127800  | -1.38722700 | -1.17943000 |
| C | 5.40816500  | -1.79681000 | -0.87195500 |
| H | 5.72256000  | -0.90916300 | -1.42716900 |
| H | 5.51484500  | -2.65532700 | -1.54066600 |
| H | 6.04622600  | -1.93115900 | -0.00015900 |
| C | 3.96907700  | -1.65624900 | -0.45174300 |
| O | 3.15105600  | -1.46165400 | -1.48127400 |
| O | 3.58737300  | -1.71530700 | 0.70582100  |

**IM2**

|   |             |             |             |
|---|-------------|-------------|-------------|
| O | -4.94811800 | -0.27495900 | 0.34423900  |
| H | -4.99248000 | -0.57162300 | 1.26309800  |
| C | -2.96821000 | -1.66370400 | -0.02746200 |
| C | -2.42775300 | -2.70536100 | 0.66640600  |
| H | -2.96770500 | -3.55705600 | 1.05169400  |
| C | -1.02398600 | -2.44530100 | 0.77485900  |
| C | 0.45753000  | -0.49661100 | -0.12713200 |
| C | -0.80071600 | -1.26306300 | 0.13650000  |
| O | -1.97853000 | -0.77170400 | -0.35610000 |
| O | 0.83220900  | -0.55459400 | -1.48733200 |
| C | -4.35964000 | -1.33260300 | -0.43399700 |
| H | -4.96337000 | -2.24328200 | -0.36804900 |
| H | -0.27534000 | -3.05863100 | 1.25263500  |
| H | -4.38397100 | -0.98072900 | -1.46713800 |
| C | 0.01500100  | 3.13048600  | 0.49906300  |
| C | 0.60913000  | 2.73070400  | 1.65179300  |
| C | 0.36064700  | 0.94158200  | 0.35641300  |
| N | -0.13887400 | 2.00921100  | -0.29419200 |
| H | -0.30523200 | 4.10514000  | 0.17351600  |
| H | 0.90686100  | 3.28536700  | 2.52509100  |
| N | 0.82057600  | 1.37100100  | 1.54740400  |
| C | -0.74923300 | 2.04426200  | -1.64472300 |
| C | -2.18885000 | 2.54033900  | -1.60994800 |
| H | -0.67804500 | 1.04107900  | -2.05151800 |
| H | -0.12272400 | 2.69825600  | -2.25485100 |
| H | -2.81525100 | 1.89193600  | -0.99433300 |
| H | -2.58505700 | 2.53333500  | -2.62867500 |
| C | 1.44425700  | 0.54191500  | 2.58749800  |
| H | 2.24876800  | -0.04978500 | 2.14921400  |
| H | 1.85110100  | 1.21015700  | 3.34374200  |
| H | 0.69763700  | -0.10991200 | 3.04214400  |
| H | -2.25964000 | 3.56276500  | -1.23100700 |
| H | 1.84520500  | -0.62273500 | -1.51818500 |
| C | 5.57816100  | -1.07106700 | -0.63574900 |
| H | 5.96602700  | -0.08331600 | -0.90437000 |
| H | 5.85347100  | -1.75500600 | -1.44353800 |
| H | 6.04827500  | -1.39770700 | 0.29273500  |
| C | 4.05719600  | -1.00296500 | -0.50373000 |
| O | 3.42191500  | -0.71420300 | -1.56932900 |
| O | 3.53485300  | -1.22050700 | 0.61549000  |
| H | 1.23971500  | -0.96368800 | 0.48080800  |

**TS2**

|   |            |             |             |
|---|------------|-------------|-------------|
| O | 4.89579100 | -0.98526000 | -1.17378200 |
|---|------------|-------------|-------------|



|   |             |             |             |
|---|-------------|-------------|-------------|
| H | 4.73447200  | -1.88186200 | -1.49633200 |
| C | 3.00366400  | -1.25721900 | 0.36236300  |
| C | 2.35844000  | -2.36477400 | 0.82672600  |
| H | 2.83029800  | -3.25436100 | 1.21765100  |
| C | 0.95609900  | -2.12227400 | 0.66960000  |
| C | -0.30028100 | -0.00414300 | -0.24382400 |
| C | 0.82389300  | -0.86651300 | 0.13220700  |
| O | 2.07933700  | -0.33210400 | -0.05161600 |
| O | -0.28320300 | 0.34056300  | -1.63247900 |
| C | 4.44008300  | -0.92025900 | 0.19254500  |
| H | 5.03022200  | -1.59141700 | 0.82563000  |
| H | 0.14883800  | -2.79853400 | 0.90532700  |
| H | 4.63671500  | 0.10656100  | 0.50829900  |
| C | -3.80303600 | -0.81788300 | 0.45561600  |
| C | -3.27995000 | -0.80810000 | 1.70034900  |
| C | -1.60494900 | -0.38792700 | 0.25354500  |
| N | -2.76987000 | -0.56169400 | -0.43845200 |
| H | -4.81178200 | -0.97788100 | 0.11491900  |
| H | -3.73977700 | -0.95221800 | 2.66301600  |
| N | -1.92647600 | -0.53230900 | 1.57575600  |
| C | -2.96717800 | -0.64537000 | -1.89870400 |
| C | -2.51524000 | -1.98091900 | -2.47877500 |
| H | -2.42868600 | 0.17493400  | -2.36289300 |
| H | -4.03634800 | -0.49780400 | -2.05896500 |
| H | -1.44194200 | -2.12571800 | -2.34023900 |
| H | -2.72312700 | -1.99636800 | -3.55256700 |
| C | -1.03077000 | -0.34572000 | 2.71127800  |
| H | -0.35797400 | 0.48909900  | 2.51745100  |
| H | -1.63655600 | -0.11872800 | 3.58747000  |
| H | -0.43917900 | -1.24299300 | 2.89877900  |
| H | -3.04719100 | -2.81702700 | -2.01604800 |
| H | -0.13069600 | 1.30597400  | -1.68229600 |
| C | 0.60592300  | 4.71503100  | 0.35596400  |
| H | -0.08124400 | 4.99706600  | 1.15687900  |
| H | 0.54520600  | 5.43399700  | -0.45982400 |
| H | 1.61764500  | 4.72717200  | 0.77226800  |
| C | 0.29366600  | 3.32616200  | -0.13620400 |
| O | 0.15731800  | 3.06565100  | -1.33357000 |
| O | 0.19320100  | 2.42963900  | 0.81648800  |
| H | -0.01620800 | 1.40966200  | 0.42390300  |

### IM3

|   |             |             |            |
|---|-------------|-------------|------------|
| O | -4.99869400 | -0.59885100 | 1.26461700 |
| H | -4.91247800 | -1.51323500 | 1.56554100 |

|   |             |             |             |
|---|-------------|-------------|-------------|
| C | -3.16184200 | -1.02196400 | -0.30621600 |
| C | -2.64252100 | -2.18502200 | -0.79281100 |
| H | -3.21113000 | -3.01482800 | -1.18687800 |
| C | -1.22212200 | -2.09972600 | -0.64629400 |
| C | 0.26268100  | -0.15864600 | 0.27961600  |
| C | -0.94610400 | -0.86895500 | -0.09663400 |
| O | -2.13891100 | -0.20650400 | 0.11118600  |
| O | 0.26281900  | 0.29487400  | 1.62888900  |
| C | -4.55336600 | -0.54521500 | -0.10677200 |
| H | -5.21559700 | -1.13862700 | -0.74641600 |
| H | -0.49882800 | -2.86234600 | -0.88956700 |
| H | -4.65200600 | 0.50374200  | -0.39428900 |
| C | 3.72395400  | -1.00808900 | -0.48820000 |
| C | 3.16065200  | -1.09737400 | -1.70978200 |
| C | 1.52247500  | -0.56655400 | -0.24245100 |
| N | 2.72097300  | -0.68519800 | 0.42244500  |
| H | 4.74452700  | -1.14237300 | -0.17235300 |
| H | 3.59099700  | -1.31388700 | -2.67255800 |
| N | 1.80529300  | -0.82100200 | -1.56709400 |
| C | 2.95981400  | -0.69391400 | 1.87551100  |
| C | 2.49760300  | -1.98094300 | 2.55133400  |
| H | 2.45987700  | 0.16462600  | 2.31476100  |
| H | 4.03656300  | -0.56438300 | 1.99717200  |
| H | 1.41621000  | -2.10380800 | 2.46441500  |
| H | 2.74799500  | -1.94096100 | 3.61562500  |
| C | 0.89718700  | -0.65874200 | -2.69174400 |
| H | 0.28063900  | 0.23007800  | -2.54733600 |
| H | 1.49242800  | -0.53420600 | -3.59558100 |
| H | 0.23950800  | -1.52216600 | -2.80653800 |
| H | 2.98882700  | -2.85688800 | 2.11815400  |
| H | 0.26771300  | 1.26988600  | 1.61669700  |
| C | -0.00879600 | 4.78979000  | -0.44664400 |
| H | 0.70437600  | 4.96314500  | -1.25611700 |
| H | 0.17675700  | 5.48520100  | 0.36975700  |
| H | -1.01123700 | 4.95698200  | -0.85047800 |
| C | 0.10184100  | 3.37536100  | 0.04086200  |
| O | 0.29628000  | 3.07003000  | 1.21000000  |
| O | -0.03851000 | 2.47402700  | -0.92611200 |
| H | 0.05840600  | 1.52880500  | -0.55876900 |

#### IM4

|   |             |             |             |
|---|-------------|-------------|-------------|
| O | -5.56689100 | -2.38758900 | -0.98191200 |
| H | -6.13128400 | -1.69787100 | -0.60799500 |
| C | -3.82941900 | -1.64131500 | 0.58580200  |

|   |             |             |             |
|---|-------------|-------------|-------------|
| C | -3.90167600 | -0.94152700 | 1.75490100  |
| H | -4.58324300 | -1.14412000 | 2.56858200  |
| C | -2.94523300 | 0.11557300  | 1.67461200  |
| C | -1.28582300 | 0.72506000  | -0.23547900 |
| C | -2.30976900 | -0.00760900 | 0.45253400  |
| O | -2.85594000 | -1.08555400 | -0.21465400 |
| O | -1.45204900 | 0.86494200  | -1.62195900 |
| C | -4.61394300 | -2.77199000 | 0.03484000  |
| H | -5.12523900 | -3.27321300 | 0.86403000  |
| H | -2.77519300 | 0.89323000  | 2.40207200  |
| H | -3.96499100 | -3.50143100 | -0.45539300 |
| C | 1.16780300  | 3.17738000  | 0.81526700  |
| C | 1.15723000  | 2.36204300  | 1.88792400  |
| C | -0.33670500 | 1.53710500  | 0.39331000  |
| N | 0.25897500  | 2.68055000  | -0.11728600 |
| H | 1.73685400  | 4.07046700  | 0.61893700  |
| H | 1.73102100  | 2.38825100  | 2.79858100  |
| N | 0.24058000  | 1.34118500  | 1.63854800  |
| C | -0.18006800 | 3.46812800  | -1.27654500 |
| C | -1.49269300 | 4.21099200  | -1.03786300 |
| H | -0.27348000 | 2.80502700  | -2.13322400 |
| H | 0.62594300  | 4.17611700  | -1.47854400 |
| H | -2.31231500 | 3.51366000  | -0.85071900 |
| H | -1.74577900 | 4.79855800  | -1.92539900 |
| C | 0.19103800  | 0.11209900  | 2.41117700  |
| H | 0.18231500  | -0.74633300 | 1.73469000  |
| H | 1.08266500  | 0.06242200  | 3.03605500  |
| H | -0.69785400 | 0.06067300  | 3.04404500  |
| H | -1.41331200 | 4.89414500  | -0.18722900 |
| H | -0.90075100 | 0.19943700  | -2.07329200 |
| C | 0.99208700  | -1.51766000 | -1.69444700 |
| O | 0.37930300  | -1.00205300 | -2.62985100 |
| C | 2.37051900  | -1.22584100 | -1.39079600 |
| C | 3.31085700  | -0.39889500 | -1.95854000 |
| O | 2.92413600  | -1.87805500 | -0.31447400 |
| C | 4.49188600  | -0.54822700 | -1.19072900 |
| H | 3.15723300  | 0.23332400  | -2.81920400 |
| C | 4.20669000  | -1.45534600 | -0.20167000 |
| H | 5.43833600  | -0.05113500 | -1.33746400 |
| C | 5.02255700  | -2.02038100 | 0.90379900  |
| H | 4.94007700  | -3.11340600 | 0.90080900  |
| H | 6.06910100  | -1.75156900 | 0.72945600  |
| O | 4.55545000  | -1.48800400 | 2.15340700  |
| H | 4.98999700  | -1.97940900 | 2.86292500  |

|            |              |              |              |
|------------|--------------|--------------|--------------|
| H          | 0. 50891500  | -2. 25598900 | -1. 03358500 |
| <b>TS3</b> |              |              |              |
| O          | 4. 48256900  | 1. 89640600  | -0. 76809900 |
| H          | 4. 81521700  | 1. 37966000  | -1. 51420300 |
| C          | 3. 64780100  | -0. 19042500 | 0. 21267500  |
| C          | 3. 96924400  | -1. 50553300 | 0. 05172800  |
| H          | 4. 96919100  | -1. 91362000 | 0. 04192300  |
| C          | 2. 73971500  | -2. 22121900 | -0. 09553300 |
| C          | 0. 28139500  | -1. 43223600 | -0. 21759700 |
| C          | 1. 73272000  | -1. 29615600 | -0. 00799700 |
| O          | 2. 28023500  | -0. 04940400 | 0. 16133300  |
| O          | -0. 02808800 | -2. 62797500 | -0. 84920500 |
| C          | 4. 46344900  | 1. 03774300  | 0. 38874000  |
| H          | 5. 48090100  | 0. 73735100  | 0. 66098400  |
| H          | 2. 60925700  | -3. 28144300 | -0. 24057400 |
| H          | 4. 06526000  | 1. 65797300  | 1. 19489800  |
| C          | -2. 65651600 | -0. 78679300 | 1. 85036700  |
| C          | -1. 70244800 | -0. 24737900 | 2. 63829800  |
| C          | -0. 68387300 | -1. 08557800 | 0. 81906300  |
| N          | -2. 03117100 | -1. 29868100 | 0. 72774200  |
| H          | -3. 72348300 | -0. 84967000 | 1. 97841900  |
| H          | -1. 76792100 | 0. 25631300  | 3. 58706800  |
| N          | -0. 48453300 | -0. 44352400 | 2. 00749500  |
| C          | -2. 80047300 | -2. 02380200 | -0. 30660100 |
| C          | -3. 02768100 | -3. 48757900 | 0. 05533700  |
| H          | -2. 28352900 | -1. 92466300 | -1. 25372100 |
| H          | -3. 75296100 | -1. 49786100 | -0. 38761400 |
| H          | -2. 07824800 | -4. 01907000 | 0. 13624600  |
| H          | -3. 62356600 | -3. 96285900 | -0. 72924700 |
| C          | 0. 77384500  | -0. 03967500 | 2. 63958500  |
| H          | 1. 17405200  | 0. 85413900  | 2. 16557800  |
| H          | 0. 55731200  | 0. 16918200  | 3. 68565800  |
| H          | 1. 50184500  | -0. 84650500 | 2. 58736400  |
| H          | -3. 57247900 | -3. 58492800 | 0. 99846800  |
| H          | -0. 15822000 | -2. 35623600 | -1. 81264600 |
| C          | -0. 03316000 | -0. 19903800 | -1. 96242000 |
| O          | -0. 35569900 | -1. 11696000 | -2. 79913100 |
| C          | -1. 00922500 | 0. 84991900  | -1. 62694800 |
| C          | -2. 31036000 | 1. 07379600  | -1. 98771600 |
| O          | -0. 57115800 | 1. 88437700  | -0. 84054300 |
| C          | -2. 69404100 | 2. 31058200  | -1. 38223300 |
| H          | -2. 90810200 | 0. 44046300  | -2. 62349800 |
| C          | -1. 60810900 | 2. 76685100  | -0. 69400200 |

|   |             |            |             |
|---|-------------|------------|-------------|
| H | -3.65021100 | 2.80723200 | -1.45310200 |
| C | -1.35829600 | 3.99336000 | 0.09974500  |
| H | -0.41975900 | 4.45994700 | -0.22154800 |
| H | -2.17580400 | 4.69669000 | -0.08979900 |
| O | -1.28612300 | 3.66958100 | 1.50324100  |
| H | -0.96636500 | 4.45453100 | 1.96707400  |
| H | 0.99973600  | 0.16957000 | -1.93210400 |

## IM5

|   |             |             |             |
|---|-------------|-------------|-------------|
| O | 4.98905100  | 1.37978900  | -1.00995500 |
| H | 5.43807300  | 0.61022300  | -1.38479100 |
| C | 3.63944700  | -0.12526100 | 0.37520800  |
| C | 3.79202600  | -1.41899900 | 0.77940300  |
| H | 4.69227100  | -1.85081100 | 1.19115000  |
| C | 2.54505000  | -2.07817000 | 0.53607900  |
| C | 0.26877500  | -1.28123600 | -0.49561900 |
| C | 1.70415100  | -1.14457900 | 0.00494700  |
| O | 2.36544300  | 0.04968700  | -0.10312600 |
| O | 0.07026500  | -2.51581300 | -0.99832600 |
| C | 4.56195400  | 1.03908500  | 0.32148200  |
| H | 5.42460800  | 0.82403500  | 0.96098800  |
| H | 2.30200100  | -3.11212000 | 0.72077700  |
| H | 4.07227200  | 1.93798900  | 0.70193800  |
| C | -2.65029600 | -1.11693400 | 1.81631400  |
| C | -1.78559000 | -0.33972000 | 2.50808500  |
| C | -0.75234200 | -1.01546400 | 0.64287100  |
| N | -2.00536800 | -1.52600700 | 0.66635500  |
| H | -3.66433000 | -1.40891500 | 2.02923100  |
| H | -1.89108400 | 0.18123500  | 3.44390200  |
| N | -0.61647700 | -0.28026700 | 1.77329000  |
| C | -2.69400700 | -2.38553200 | -0.32563100 |
| C | -2.69628900 | -3.85044300 | 0.09087300  |
| H | -2.19885600 | -2.25531200 | -1.27937500 |
| H | -3.71147500 | -1.99600800 | -0.39476700 |
| H | -1.67412500 | -4.22629400 | 0.15279500  |
| H | -3.23650300 | -4.43457600 | -0.65953300 |
| C | 0.54141200  | 0.49892900  | 2.23072900  |
| H | 0.83064900  | 1.22466500  | 1.47621000  |
| H | 0.23829800  | 1.02384700  | 3.13399100  |
| H | 1.37500000  | -0.16180600 | 2.46301000  |
| H | -3.19395200 | -3.99491500 | 1.05382000  |
| H | -0.23696800 | -1.90321200 | -2.41049600 |
| C | 0.02549600  | -0.18448800 | -1.74532000 |
| O | -0.34593200 | -0.98373700 | -2.83185800 |

|   |             |            |             |
|---|-------------|------------|-------------|
| C | -0.99137000 | 0.88210300 | -1.51062800 |
| C | -2.25503600 | 1.09788600 | -1.97579300 |
| O | -0.61886500 | 1.91883200 | -0.69628600 |
| C | -2.69142800 | 2.34026500 | -1.40778100 |
| H | -2.79695600 | 0.45912400 | -2.65418500 |
| C | -1.67026500 | 2.80492100 | -0.63734800 |
| H | -3.64095300 | 2.83158800 | -1.55980400 |
| C | -1.49247600 | 4.02570100 | 0.18177200  |
| H | -0.51709100 | 4.48057100 | -0.02693300 |
| H | -2.27307900 | 4.74134900 | -0.09610100 |
| O | -1.58701400 | 3.69987200 | 1.58510300  |
| H | -1.35224500 | 4.49343000 | 2.08409200  |
| H | 0.98850600  | 0.30239500 | -1.92570800 |

**TS4**

|   |             |             |             |
|---|-------------|-------------|-------------|
| O | 4.48771300  | -2.05454200 | -0.62069200 |
| H | 4.42311800  | -2.93085700 | -1.02345000 |
| C | 2.25471800  | -2.34499900 | 0.34131500  |
| C | 1.47123100  | -3.43662400 | 0.58619600  |
| H | 1.79431700  | -4.35414100 | 1.05473600  |
| C | 0.16636000  | -3.12573100 | 0.09661300  |
| C | -0.78188100 | -1.03682900 | -1.11410400 |
| C | 0.23613800  | -1.85835400 | -0.40913700 |
| O | 1.50566100  | -1.37538300 | -0.26801000 |
| O | -1.76483000 | -1.64396500 | -1.59811900 |
| C | 3.69429500  | -2.05787700 | 0.57898800  |
| H | 4.07767800  | -2.79235100 | 1.29481800  |
| H | -0.71006700 | -3.75386700 | 0.11060900  |
| H | 3.81976100  | -1.06279000 | 1.01011200  |
| C | -3.31599100 | 0.54233500  | 2.07812700  |
| C | -2.16785000 | 0.54327000  | 2.79653500  |
| C | -1.62897100 | 0.01183500  | 0.65772200  |
| N | -2.96744500 | 0.21650300  | 0.77413500  |
| H | -4.33096300 | 0.75848600  | 2.36802900  |
| H | -1.98219400 | 0.75509400  | 3.83656600  |
| N | -1.14960200 | 0.21996700  | 1.91135600  |
| C | -3.95940600 | 0.14129600  | -0.30992700 |
| C | -4.81994900 | -1.11538500 | -0.23390900 |
| H | -3.41529700 | 0.18085300  | -1.24849900 |
| H | -4.58039700 | 1.03784700  | -0.24103600 |
| H | -4.20334800 | -2.01203900 | -0.32199000 |
| H | -5.54186300 | -1.11248600 | -1.05575100 |
| C | 0.24860200  | 0.09967700  | 2.32096700  |
| H | 0.89580000  | 0.35062300  | 1.48658700  |

|   |             |             |             |
|---|-------------|-------------|-------------|
| H | 0.43601100  | 0.79749000  | 3.13673900  |
| H | 0.46152700  | -0.91529900 | 2.66323400  |
| H | -5.37990100 | -1.16217800 | 0.70421900  |
| H | -1.87590800 | -0.32451500 | -2.86341800 |
| C | -0.25638700 | 0.16547300  | -2.00438000 |
| O | -1.28532200 | 0.45453800  | -2.93303700 |
| C | 0.16677300  | 1.45321500  | -1.37431400 |
| C | -0.43888500 | 2.67198300  | -1.28626500 |
| O | 1.42615300  | 1.52579600  | -0.85370400 |
| C | 0.50156400  | 3.54616000  | -0.65119200 |
| H | -1.42804700 | 2.91509400  | -1.63852400 |
| C | 1.62045400  | 2.80977100  | -0.40544700 |
| H | 0.36742100  | 4.59096000  | -0.41390200 |
| C | 2.93442800  | 3.12920600  | 0.19981700  |
| H | 3.74134400  | 2.72578700  | -0.42242000 |
| H | 3.03936000  | 4.21852100  | 0.23760800  |
| O | 3.01883600  | 2.57045100  | 1.52779100  |
| H | 3.93804100  | 2.64390800  | 1.81630800  |
| H | 0.61579200  | -0.25513300 | -2.52846900 |

## IM6

|   |             |             |             |
|---|-------------|-------------|-------------|
| O | 3.04714800  | -2.47101300 | 3.32675500  |
| H | 3.18783000  | -3.42228400 | 3.22714600  |
| C | 1.51012400  | -2.42522300 | 1.43461700  |
| C | 0.80828600  | -3.38801300 | 0.75539500  |
| H | 0.21742300  | -4.17247500 | 1.20232500  |
| C | 1.01300400  | -3.14341100 | -0.62625400 |
| C | 2.37928400  | -1.32711600 | -1.84260900 |
| C | 1.82900100  | -2.04248500 | -0.70818900 |
| O | 2.13226600  | -1.59943200 | 0.55516000  |
| O | 2.21027500  | -1.70544500 | -2.99569900 |
| C | 1.71649800  | -2.16630200 | 2.88766500  |
| H | 0.97331600  | -2.74035200 | 3.44920400  |
| H | 0.61280900  | -3.69738500 | -1.46102400 |
| H | 1.56843000  | -1.10681200 | 3.10462200  |
| C | -4.82834000 | 1.29533900  | -0.46847900 |
| C | -4.08967200 | 1.75026800  | 0.57362100  |
| C | -3.95170900 | -0.53256100 | 0.59061300  |
| N | -4.72981900 | -0.09006700 | -0.43951800 |
| H | -5.39599500 | 1.82811100  | -1.21396400 |
| H | -3.88736600 | 2.75388500  | 0.91116400  |
| N | -3.56876200 | 0.62569300  | 1.19989300  |
| C | -5.40652800 | -0.97203300 | -1.39655100 |
| C | -6.91100900 | -1.07086200 | -1.15831600 |

|   |             |             |             |
|---|-------------|-------------|-------------|
| H | -4.93833300 | -1.95152700 | -1.30150800 |
| H | -5.20266300 | -0.60029300 | -2.40424200 |
| H | -7.12452400 | -1.46162400 | -0.15984900 |
| H | -7.35576600 | -1.74833500 | -1.89292000 |
| C | -2.70851200 | 0.69166300  | 2.37558400  |
| H | -1.80388500 | 1.26273400  | 2.15544300  |
| H | -3.23555700 | 1.16611300  | 3.20673800  |
| H | -2.43281200 | -0.32171800 | 2.65947200  |
| H | -7.39894200 | -0.09763700 | -1.25979200 |
| H | 3.49600800  | -0.16109500 | -3.49909600 |
| C | 3.19512100  | -0.04581300 | -1.59150000 |
| O | 3.95505400  | 0.26298500  | -2.75445100 |
| C | 2.28498300  | 1.07573300  | -1.18833500 |
| C | 1.03088800  | 1.45649800  | -1.56445500 |
| O | 2.79539600  | 1.97987600  | -0.29952600 |
| C | 0.75078400  | 2.67220400  | -0.86427800 |
| H | 0.38539700  | 0.93651500  | -2.25589700 |
| C | 1.84960100  | 2.95167500  | -0.10778500 |
| H | -0.15257800 | 3.26102300  | -0.91194000 |
| C | 2.17720600  | 4.04679300  | 0.83679800  |
| H | 3.19362000  | 4.41019100  | 0.64786900  |
| H | 1.47791400  | 4.87148000  | 0.66497700  |
| O | 2.06926900  | 3.56613700  | 2.19086500  |
| H | 2.43813100  | 4.24378400  | 2.77254800  |
| H | 3.89829700  | -0.22467700 | -0.77399800 |

### IM1<sub>DBU</sub>

|   |             |             |             |
|---|-------------|-------------|-------------|
| C | -3.18359200 | -4.28570700 | 0.86680100  |
| C | -3.95822400 | -4.72524500 | -0.15506500 |
| C | -3.43987900 | -2.53972900 | -0.58766700 |
| N | -2.88085200 | -2.96059000 | 0.58355000  |
| H | -2.81973400 | -4.79501500 | 1.74427100  |
| H | -4.40153400 | -5.69010400 | -0.34050100 |
| N | -4.10046400 | -3.65068300 | -1.02343200 |
| C | -2.07379600 | -2.11279400 | 1.46803400  |
| C | -2.84577800 | -1.62553300 | 2.69123700  |
| H | -1.73184300 | -1.26852700 | 0.87006000  |
| H | -1.19297500 | -2.68343700 | 1.77159200  |
| H | -3.71327800 | -1.02899500 | 2.39592300  |
| H | -2.19647100 | -1.00230400 | 3.31294400  |
| C | -4.86243900 | -3.72486000 | -2.26392400 |
| H | -4.43558100 | -4.47826900 | -2.93022200 |
| H | -5.90411000 | -3.98105000 | -2.05644500 |
| H | -4.82522600 | -2.75373900 | -2.75335900 |



|    |             |             |             |
|----|-------------|-------------|-------------|
| H  | -3.19416800 | -2.46205900 | 3.30318900  |
| Cl | 2.59089000  | -4.04102500 | 1.65273700  |
| C  | 5.72287300  | 2.66539400  | 0.03574200  |
| C  | 6.33509600  | 1.31138200  | -0.34001200 |
| C  | 5.69337200  | 0.11589100  | 0.37181000  |
| C  | 4.21846200  | 2.79696400  | -0.22523900 |
| C  | 3.34179400  | 1.78300400  | 0.54085500  |
| C  | 3.29813300  | 0.41207900  | -0.08027600 |
| H  | 6.24584200  | 3.45712100  | -0.51052000 |
| H  | 7.39735300  | 1.32012700  | -0.07461000 |
| H  | 5.55250200  | 0.32664400  | 1.43568300  |
| H  | 4.00695400  | 2.72258900  | -1.29778000 |
| H  | 3.69503400  | 1.68865000  | 1.57310200  |
| C  | 4.38536800  | -1.62853900 | -0.88900000 |
| H  | 4.32614000  | -2.40890700 | -0.12361600 |
| C  | 1.92914500  | -1.33793000 | -1.14254100 |
| H  | 1.67671700  | -2.07177700 | -0.37118300 |
| H  | 6.34630100  | -0.75328900 | 0.30746800  |
| H  | 6.28310500  | 1.15050800  | -1.42295300 |
| H  | 5.90960600  | 2.85040500  | 1.10108800  |
| H  | 3.89809600  | 3.79619300  | 0.08332700  |
| H  | 2.31704200  | 2.15089000  | 0.59400200  |
| N  | 4.40335500  | -0.31067400 | -0.21272400 |
| N  | 2.12656800  | -0.02563600 | -0.51818600 |
| H  | 5.33311800  | -1.73044600 | -1.41970700 |
| H  | 1.09103000  | -1.25373100 | -1.83511000 |
| C  | 3.21328500  | -1.73918400 | -1.85493600 |
| H  | 3.37641500  | -1.09468300 | -2.72412600 |
| H  | 3.13818500  | -2.76935900 | -2.20692400 |
| H  | 1.31778900  | 0.59162800  | -0.42068200 |
| O  | -3.59375400 | 5.48892500  | 1.95742900  |
| H  | -4.36548600 | 4.98317500  | 2.24303000  |
| C  | -3.49323200 | 4.25419200  | -0.14324400 |
| C  | -4.39068000 | 3.48751600  | -0.84365800 |
| H  | -5.41698500 | 3.74660900  | -1.05279300 |
| C  | -3.70106000 | 2.30971900  | -1.22329500 |
| C  | -1.30837000 | 1.52871800  | -0.82088800 |
| H  | -1.53594500 | 0.60879900  | -1.38344600 |
| C  | -2.42304200 | 2.43191600  | -0.72912800 |
| O  | -2.29491100 | 3.62435800  | -0.06908000 |
| O  | -0.19635500 | 1.72140900  | -0.33628300 |
| C  | -3.62088500 | 5.57950400  | 0.52782300  |
| H  | -4.54133000 | 6.05654600  | 0.17707600  |
| H  | -4.08200300 | 1.46875700  | -1.78279100 |

|                          |             |             |             |
|--------------------------|-------------|-------------|-------------|
| H                        | -2.77908300 | 6.21945900  | 0.25592100  |
| <b>TS1<sub>DBU</sub></b> |             |             |             |
| C                        | -1.69096400 | 3.06387800  | 1.34322500  |
| C                        | -1.71332200 | 2.64398700  | 2.63198900  |
| C                        | -1.89666400 | 0.80618900  | 1.31421400  |
| N                        | -1.80184000 | 1.92570500  | 0.55543300  |
| H                        | -1.59688700 | 4.05261500  | 0.92516500  |
| H                        | -1.64791500 | 3.19461300  | 3.55600200  |
| N                        | -1.84132700 | 1.26095600  | 2.59158800  |
| C                        | -1.86274700 | 1.94757100  | -0.91419700 |
| C                        | -3.20396300 | 2.45272100  | -1.43771100 |
| H                        | -1.66799700 | 0.93046400  | -1.24932200 |
| H                        | -1.05109900 | 2.58634700  | -1.26937100 |
| H                        | -4.02577800 | 1.81603600  | -1.10030200 |
| H                        | -3.19396900 | 2.44340100  | -2.53123900 |
| C                        | -1.88452800 | 0.41776500  | 3.78156800  |
| H                        | -0.92779800 | 0.45153400  | 4.30783300  |
| H                        | -2.67455700 | 0.75999100  | 4.45281400  |
| H                        | -2.09612000 | -0.60585600 | 3.48101100  |
| H                        | -3.39915000 | 3.47815300  | -1.11278400 |
| Cl                       | 1.38689400  | 5.62173900  | -1.01722300 |
| C                        | 4.97292300  | -3.43695100 | 0.65553400  |
| C                        | 5.88893500  | -2.24509200 | 0.35630400  |
| C                        | 5.51019900  | -1.47051500 | -0.91029000 |
| C                        | 3.48809500  | -3.09348600 | 0.81926000  |
| C                        | 2.83691400  | -2.44147500 | -0.42024000 |
| C                        | 3.12765900  | -0.96987800 | -0.56477300 |
| H                        | 5.32175400  | -3.93533800 | 1.56565400  |
| H                        | 6.91181100  | -2.61247700 | 0.22364400  |
| H                        | 5.28720600  | -2.15740800 | -1.73156800 |
| H                        | 3.34006700  | -2.44680500 | 1.69114000  |
| H                        | 3.16596400  | -2.95936000 | -1.32725400 |
| C                        | 4.68597800  | 0.90648700  | -0.79440100 |
| H                        | 4.77569300  | 1.19977800  | -1.84542600 |
| C                        | 2.24103000  | 1.32281100  | -0.58023800 |
| H                        | 2.08945700  | 1.63485800  | -1.61786900 |
| H                        | 6.34766500  | -0.85396000 | -1.23406700 |
| H                        | 5.91150600  | -1.55120200 | 1.20436500  |
| H                        | 5.07471200  | -4.16867400 | -0.15579500 |
| H                        | 2.93849600  | -4.01675900 | 1.02371200  |
| H                        | 1.75369500  | -2.55306300 | -0.36962600 |
| N                        | 4.37523100  | -0.53957500 | -0.73283800 |
| N                        | 2.10643900  | -0.13380700 | -0.48334900 |

|   |             |             |             |
|---|-------------|-------------|-------------|
| H | 5.65874100  | 1.04877500  | -0.32178500 |
| H | 1.45233500  | 1.77271500  | 0.02203700  |
| C | 3.62049800  | 1.73017400  | -0.08573800 |
| H | 3.68650900  | 1.57167900  | 0.99470100  |
| H | 3.78837000  | 2.79011300  | -0.28032700 |
| H | 1.15634800  | -0.52595200 | -0.36871400 |
| O | -5.89068600 | -1.03204200 | -2.32814900 |
| H | -6.44413600 | -0.83015400 | -1.56309200 |
| C | -4.43091200 | -2.35041200 | -0.87011400 |
| C | -4.60968400 | -2.93550600 | 0.35121000  |
| H | -5.45646400 | -3.53589500 | 0.64808700  |
| C | -3.46241800 | -2.60311800 | 1.13431800  |
| C | -1.32670800 | -1.25581800 | 0.57075900  |
| H | -0.96913100 | -1.45047900 | 1.59026100  |
| C | -2.66154200 | -1.83433100 | 0.33628600  |
| O | -3.23771900 | -1.68278000 | -0.88896000 |
| O | -0.52028700 | -1.07101200 | -0.36745000 |
| C | -5.26780700 | -2.30719500 | -2.09878800 |
| H | -6.02046300 | -3.10005600 | -2.03111200 |
| H | -3.25492800 | -2.89684800 | 2.15208800  |
| H | -4.65695800 | -2.49346000 | -2.98449300 |

## IM2<sub>DBU</sub>

|    |             |             |             |
|----|-------------|-------------|-------------|
| C  | 3.03683500  | -1.99252300 | 0.72036000  |
| C  | 2.54693000  | -1.83879300 | 1.97649600  |
| C  | 1.48471700  | -0.40077800 | 0.65444500  |
| N  | 2.37240600  | -1.08790900 | -0.08789900 |
| H  | 3.77858500  | -2.68359200 | 0.33744300  |
| H  | 2.78646200  | -2.34769000 | 2.89440500  |
| N  | 1.58436300  | -0.85012800 | 1.92165400  |
| C  | 2.64699400  | -0.95132400 | -1.53937700 |
| C  | 4.06544200  | -0.46587300 | -1.80955200 |
| H  | 1.90093200  | -0.27280500 | -1.93996600 |
| H  | 2.48237200  | -1.93714000 | -1.97817400 |
| H  | 4.23989800  | 0.51399200  | -1.36140000 |
| H  | 4.20529100  | -0.37946700 | -2.89034100 |
| C  | 0.80452900  | -0.38765500 | 3.07311800  |
| H  | -0.26029000 | -0.53312100 | 2.88980700  |
| H  | 1.10133700  | -0.97891000 | 3.93674300  |
| H  | 1.00960200  | 0.66470000  | 3.26966000  |
| H  | 4.81258200  | -1.16718300 | -1.43169600 |
| Cl | 5.24488600  | -4.70334400 | -0.09257500 |
| C  | -5.74580500 | 1.76537200  | 0.64939200  |
| C  | -6.40128600 | 0.38253900  | 0.56723100  |

|   |             |             |             |
|---|-------------|-------------|-------------|
| C | -6.01720300 | -0.41395700 | -0.68645700 |
| C | -4.21322500 | 1.76500600  | 0.58994200  |
| C | -3.61564600 | 1.15866300  | -0.69777300 |
| C | -3.52957900 | -0.35354300 | -0.71504100 |
| H | -6.06687600 | 2.26031500  | 1.57226800  |
| H | -7.48959900 | 0.50950100  | 0.56571700  |
| H | -6.07926800 | 0.22551700  | -1.57289700 |
| H | -3.80078200 | 1.24394900  | 1.46241200  |
| H | -4.19358300 | 1.50079600  | -1.56419400 |
| C | -4.69269300 | -2.52015500 | -0.49247100 |
| H | -4.95794700 | -2.97007700 | -1.45702200 |
| C | -2.24411100 | -2.34995700 | -0.84968600 |
| H | -2.31219500 | -2.67848400 | -1.89577800 |
| H | -6.73486400 | -1.22137000 | -0.83865200 |
| H | -6.15540200 | -0.21396500 | 1.45391800  |
| H | -6.12459500 | 2.38049200  | -0.17714500 |
| H | -3.86823800 | 2.80146800  | 0.65966900  |
| H | -2.59995200 | 1.52584000  | -0.84062200 |
| N | -4.69400500 | -1.05338300 | -0.62233400 |
| N | -2.34348900 | -0.88949300 | -0.79184700 |
| H | -5.47278700 | -2.79575500 | 0.22231800  |
| H | -1.25257100 | -2.64355000 | -0.49557500 |
| C | -3.33553300 | -3.02576500 | -0.02574700 |
| H | -3.19242300 | -2.79073100 | 1.03413800  |
| H | -3.29215300 | -4.11265600 | -0.13149700 |
| H | -0.92734500 | -0.06848600 | -0.95477600 |
| O | 4.97301700  | 3.71558100  | -0.43599300 |
| H | 5.01613400  | 4.04515000  | 0.47052700  |
| C | 2.53082300  | 3.62922700  | -0.29405200 |
| C | 1.64166600  | 4.20168200  | 0.56618900  |
| H | 1.64611400  | 5.23180100  | 0.88881800  |
| C | 0.71496000  | 3.17744900  | 0.94285300  |
| C | 0.50039300  | 0.67624600  | 0.21547200  |
| H | -0.29513300 | 0.67000000  | 0.96955900  |
| C | 1.10082600  | 2.04942400  | 0.28349100  |
| O | 2.20848200  | 2.30772700  | -0.47120400 |
| O | -0.03420600 | 0.41422700  | -1.05984000 |
| C | 3.72773300  | 4.15057800  | -1.00680400 |
| H | 3.66950200  | 5.24392500  | -1.02357300 |
| H | -0.13168100 | 3.26984800  | 1.60585400  |
| H | 3.74193900  | 3.79545700  | -2.03906900 |

**IM1a**

|   |             |             |            |
|---|-------------|-------------|------------|
| C | -3.59524900 | -2.88317600 | 2.47924200 |
|---|-------------|-------------|------------|

|    |             |             |             |
|----|-------------|-------------|-------------|
| C  | -3.16972100 | -3.59203400 | 1.39097100  |
| H  | -3.07418300 | -4.66357000 | 1.32159500  |
| C  | -2.87927100 | -2.62784500 | 0.38951600  |
| C  | -3.02571100 | -0.08218200 | 0.37225500  |
| H  | -2.67429600 | -0.04322600 | -0.67113500 |
| C  | -3.14999600 | -1.39893300 | 0.94124700  |
| O  | -3.59212300 | -1.55815600 | 2.23029500  |
| O  | -3.29981300 | 0.95818500  | 0.97272100  |
| H  | -2.50803100 | -2.80140900 | -0.60884100 |
| C  | 1.01526900  | -0.17194300 | 0.31495300  |
| C  | 2.90208800  | -0.76000300 | -1.01934400 |
| N  | 1.51824900  | -0.48836500 | -0.89450400 |
| C  | 5.00001800  | -0.85162100 | 0.48136700  |
| C  | 5.73439300  | 0.47867500  | 0.65276000  |
| H  | 5.48838700  | -1.41846700 | -0.31522500 |
| H  | 5.12332300  | -1.43461400 | 1.39865900  |
| H  | 5.67363200  | 1.06686600  | -0.26789900 |
| C  | 0.60172000  | -0.57703300 | -2.04663400 |
| H  | -0.21513600 | 0.12707500  | -1.87889900 |
| H  | 1.12797000  | -0.22264400 | -2.93619700 |
| H  | 5.28996700  | 1.05680500  | 1.46782500  |
| O  | 7.10536300  | 0.16287200  | 0.95349700  |
| C  | 8.03539700  | 1.13037100  | 1.18676200  |
| O  | 9.16482100  | 0.79643500  | 1.42480900  |
| C  | 0.03796000  | -1.96319800 | -2.30120300 |
| C  | -1.02436700 | -2.07573100 | -3.20941700 |
| C  | 0.52239700  | -3.11712800 | -1.68130700 |
| C  | -1.57331800 | -3.32188400 | -3.50066700 |
| H  | -1.43612600 | -1.17547800 | -3.65523900 |
| C  | -0.02948900 | -4.36595900 | -1.97492400 |
| H  | 1.32302100  | -3.05000100 | -0.95370300 |
| C  | -1.07526200 | -4.47387200 | -2.88830400 |
| H  | -2.39785800 | -3.39179000 | -4.20176200 |
| H  | 0.35986000  | -5.25227900 | -1.48552900 |
| H  | -1.50255900 | -5.44378300 | -3.11814200 |
| Cl | -2.30436900 | 1.40773800  | -2.70890000 |
| N  | -3.08516300 | 3.55220400  | 0.05053800  |
| C  | -3.41192900 | 4.06407200  | 1.43610100  |
| H  | -4.46552700 | 3.83177500  | 1.59740300  |
| H  | -2.84447100 | 3.43808200  | 2.12470400  |
| C  | -4.18461500 | 3.73221800  | -0.98112400 |
| H  | -3.88254500 | 3.07937600  | -1.80537800 |
| H  | -5.08297300 | 3.30946900  | -0.52640900 |
| C  | -1.72654600 | 3.95553400  | -0.47536800 |

|   |             |             |             |
|---|-------------|-------------|-------------|
| H | -1.66977500 | 3.50720900  | -1.47030700 |
| H | -1.71206900 | 5.04250300  | -0.55693800 |
| C | -3.12783600 | 5.53707800  | 1.70489000  |
| H | -3.67649200 | 6.20641900  | 1.04311900  |
| H | -3.43843600 | 5.75768200  | 2.72934200  |
| H | -2.06517200 | 5.77308700  | 1.63070700  |
| C | -4.43556800 | 5.15185600  | -1.46882100 |
| H | -5.16783000 | 5.09573800  | -2.27801700 |
| H | -4.84844200 | 5.81014900  | -0.70222800 |
| H | -3.53735500 | 5.61136200  | -1.88516900 |
| C | -0.58446000 | 3.43466300  | 0.38606000  |
| H | 0.35669800  | 3.72626400  | -0.08631500 |
| H | -0.58371400 | 3.84519400  | 1.39910600  |
| H | -0.59042100 | 2.34383300  | 0.44553500  |
| C | 7.58244000  | 2.57396500  | 1.13113600  |
| H | 7.17817900  | 2.82386000  | 0.14689300  |
| H | 6.80032900  | 2.77113000  | 1.86875500  |
| H | 8.44114600  | 3.20798000  | 1.33891100  |
| C | 3.54373800  | -0.66441400 | 0.17270400  |
| S | 2.35817100  | -0.22641000 | 1.40351600  |
| C | 3.50128500  | -1.08356300 | -2.35455700 |
| H | 2.97877300  | -1.91089800 | -2.84121300 |
| H | 3.46070200  | -0.22363800 | -3.03080700 |
| H | 4.54832900  | -1.36636000 | -2.24364700 |
| H | -3.05264100 | 2.51314400  | 0.18506600  |
| C | -4.06022200 | -3.30317500 | 3.88601200  |
| H | -3.41631100 | -2.86546600 | 4.61996700  |
| H | -5.06333500 | -2.96662500 | 4.04538200  |
| O | -4.01192800 | -4.72793200 | 3.99841500  |
| H | -4.30212100 | -4.99023800 | 4.87510400  |

### TS1a

|   |             |             |             |
|---|-------------|-------------|-------------|
| C | -1.56507600 | -2.15200200 | 3.51820400  |
| C | -2.23697800 | -2.99903100 | 2.68549900  |
| H | -2.57084100 | -3.99546300 | 2.92985200  |
| C | -2.39748700 | -2.30928500 | 1.44630600  |
| C | -1.69712400 | 0.06865200  | 0.69986600  |
| H | -2.15240700 | -0.10445700 | -0.28209600 |
| C | -1.81301200 | -1.08502100 | 1.61138400  |
| O | -1.30972500 | -0.97585200 | 2.87444600  |
| O | -1.63106400 | 1.24198000  | 1.16593400  |
| H | -2.87292200 | -2.66707700 | 0.54670600  |
| C | 0.26152900  | -0.40585700 | -0.06059800 |
| C | 2.09841800  | -1.10434900 | -1.34571300 |

|    |             |             |             |
|----|-------------|-------------|-------------|
| N  | 0.70206800  | -0.94277700 | -1.20335200 |
| C  | 4.24949400  | -0.64668300 | 0.00852200  |
| C  | 4.86006900  | 0.73761500  | -0.21842300 |
| H  | 4.75696500  | -1.36230900 | -0.64242400 |
| H  | 4.46287500  | -0.95601200 | 1.03540500  |
| H  | 4.70272700  | 1.05790900  | -1.25297400 |
| C  | -0.25861100 | -1.33722500 | -2.26162900 |
| H  | -1.04706400 | -0.57782500 | -2.30083800 |
| H  | 0.26751800  | -1.28357300 | -3.21638400 |
| H  | 4.39897600  | 1.47157600  | 0.44888900  |
| O  | 6.26452500  | 0.61833000  | 0.05919000  |
| C  | 7.11053600  | 1.68598800  | -0.01495400 |
| O  | 8.27574000  | 1.51000500  | 0.21548300  |
| C  | -0.86759700 | -2.71275300 | -2.07553900 |
| C  | -2.13724300 | -2.93907400 | -2.62148500 |
| C  | -0.21335800 | -3.75869800 | -1.41958700 |
| C  | -2.72808000 | -4.19733800 | -2.52656500 |
| H  | -2.66458100 | -2.11520900 | -3.09243800 |
| C  | -0.80936800 | -5.01572500 | -1.32064300 |
| H  | 0.75540800  | -3.59726100 | -0.95932700 |
| C  | -2.06580300 | -5.24054500 | -1.87932700 |
| H  | -3.71343800 | -4.35830800 | -2.94997700 |
| H  | -0.29260700 | -5.81584000 | -0.80212200 |
| H  | -2.52930700 | -6.21795500 | -1.80308200 |
| Cl | -2.97661700 | 0.78093400  | -2.64506800 |
| N  | -2.72823600 | 3.37662500  | 0.08448400  |
| C  | -2.52378300 | 4.27843300  | 1.27649000  |
| H  | -3.22263000 | 3.92867000  | 2.03787800  |
| H  | -1.52237800 | 4.05899200  | 1.64931600  |
| C  | -4.16140300 | 2.95453800  | -0.16082200 |
| H  | -4.08897100 | 2.15627400  | -0.90599300 |
| H  | -4.50099800 | 2.51516700  | 0.77967800  |
| C  | -2.03531400 | 3.81755700  | -1.17823600 |
| H  | -2.30377200 | 3.06753400  | -1.92830400 |
| H  | -2.44341500 | 4.78441000  | -1.47561500 |
| C  | -2.68037300 | 5.77732400  | 1.04027100  |
| H  | -3.66785200 | 6.04833500  | 0.66805300  |
| H  | -2.53382800 | 6.28915800  | 1.99500900  |
| H  | -1.93394500 | 6.16634100  | 0.34557100  |
| C  | -5.12266800 | 4.03669700  | -0.63391400 |
| H  | -6.07315700 | 3.55290800  | -0.87185100 |
| H  | -5.32461200 | 4.79916700  | 0.12112100  |
| H  | -4.77800200 | 4.52334200  | -1.54831400 |
| C  | -0.52065300 | 3.87508400  | -1.02167500 |

|   |             |             |             |
|---|-------------|-------------|-------------|
| H | -0.08193500 | 4.10650900  | -1.99510300 |
| H | -0.18829200 | 4.64125900  | -0.31636400 |
| H | -0.12811400 | 2.90948600  | -0.69716000 |
| C | 6.51973000  | 3.03022900  | -0.38226000 |
| H | 6.03585800  | 2.99683200  | -1.36170300 |
| H | 5.76814100  | 3.34263000  | 0.34734600  |
| H | 7.32483600  | 3.76083100  | -0.40351400 |
| C | 2.77072000  | -0.67132200 | -0.24696800 |
| S | 1.61725700  | -0.06950100 | 0.93574400  |
| C | 2.68086300  | -1.67747000 | -2.60156400 |
| H | 2.22188300  | -2.63534000 | -2.85838100 |
| H | 2.54284300  | -1.00366600 | -3.45280000 |
| H | 3.75161200  | -1.84075100 | -2.48021800 |
| H | -2.25082500 | 2.45952200  | 0.38999200  |
| C | -1.09425000 | -2.27609800 | 4.91866700  |
| H | -1.33897600 | -1.35827100 | 5.46729900  |
| H | -1.62394200 | -3.11371900 | 5.38736900  |
| O | 0.32473600  | -2.50134300 | 4.93760000  |
| H | 0.63595600  | -2.38143100 | 5.84075600  |

### IM2a

|   |             |             |             |
|---|-------------|-------------|-------------|
| C | -3.16923800 | -1.82701300 | 2.11792000  |
| C | -4.04835100 | -1.67410400 | 1.08820800  |
| H | -5.00590900 | -2.16245200 | 0.99546800  |
| C | -3.44779000 | -0.76165900 | 0.16359500  |
| C | -1.18457100 | 0.53155400  | 0.24260500  |
| H | -1.46599900 | 0.84592700  | -0.78825000 |
| C | -2.24424900 | -0.41986800 | 0.69851400  |
| O | -2.05681400 | -1.06241700 | 1.89352700  |
| O | -1.03003700 | 1.63295700  | 1.11750000  |
| H | -3.82933300 | -0.40691400 | -0.78195000 |
| C | 0.16786100  | -0.12652300 | 0.14953700  |
| C | 1.92408600  | -1.45827400 | -0.51579000 |
| N | 0.57847700  | -1.08421600 | -0.68072500 |
| C | 3.96100300  | -0.82467000 | 0.93792000  |
| C | 4.85125400  | 0.20588100  | 0.23742900  |
| H | 4.36578200  | -1.82227900 | 0.75626200  |
| H | 4.02087600  | -0.65987700 | 2.01688700  |
| H | 4.85267200  | 0.03509300  | -0.84361300 |
| C | -0.27838500 | -1.67299400 | -1.74629500 |
| H | -1.13215700 | -1.00283100 | -1.89465800 |
| H | 0.28971100  | -1.59909800 | -2.67457400 |
| H | 4.48548400  | 1.21914700  | 0.42926900  |
| O | 6.16830900  | 0.03249400  | 0.77550000  |



|    |             |             |             |
|----|-------------|-------------|-------------|
| C  | 7.21865100  | 0.82422700  | 0.39687300  |
| O  | 8.29391400  | 0.61036700  | 0.88330700  |
| C  | -0.68878900 | -3.10675500 | -1.48583900 |
| C  | -0.91825200 | -3.93708100 | -2.58887600 |
| C  | -0.90472300 | -3.61134700 | -0.20158100 |
| C  | -1.35563300 | -5.24687700 | -2.40969000 |
| H  | -0.76450500 | -3.55280400 | -3.59219800 |
| C  | -1.33927500 | -4.92399800 | -0.02186100 |
| H  | -0.75287600 | -2.99004400 | 0.67274800  |
| C  | -1.56392100 | -5.74562200 | -1.12411800 |
| H  | -1.53277400 | -5.87660100 | -3.27439900 |
| H  | -1.51689100 | -5.28374200 | 0.98461700  |
| H  | -1.90446200 | -6.76543400 | -0.98449800 |
| Cl | -2.01692500 | 1.03166400  | -2.91416200 |
| N  | -1.96550000 | 3.95259300  | 0.00589700  |
| C  | -1.82774600 | 4.86252500  | 1.16393500  |
| H  | -2.56148300 | 4.53626600  | 1.90675100  |
| H  | -0.84528400 | 4.67957500  | 1.61253500  |
| C  | -3.35707600 | 3.57031300  | -0.33494600 |
| H  | -3.27810500 | 2.77613100  | -1.08249300 |
| H  | -3.79342200 | 3.12437600  | 0.56545600  |
| C  | -1.17363900 | 4.32550200  | -1.18574400 |
| H  | -1.38688300 | 3.57255700  | -1.94903000 |
| H  | -1.49148000 | 5.29705700  | -1.59001300 |
| C  | -1.96998700 | 6.37488400  | 0.92949900  |
| H  | -2.94815300 | 6.65121500  | 0.53526700  |
| H  | -1.83372000 | 6.89589400  | 1.88223700  |
| H  | -1.21140600 | 6.75387000  | 0.24044300  |
| C  | -4.30302000 | 4.65523400  | -0.87017000 |
| H  | -5.23557500 | 4.18164900  | -1.19070700 |
| H  | -4.55686000 | 5.40271400  | -0.11531600 |
| H  | -3.88515300 | 5.16760300  | -1.73993100 |
| C  | 0.33219800  | 4.35886500  | -0.92510400 |
| H  | 0.85649900  | 4.54768200  | -1.86566000 |
| H  | 0.62278500  | 5.14387000  | -0.22121700 |
| H  | 0.68266800  | 3.40195800  | -0.52995000 |
| C  | 6.94715300  | 1.91923700  | -0.61035500 |
| H  | 6.54944200  | 1.51236100  | -1.54347800 |
| H  | 6.21845500  | 2.63727300  | -0.22505100 |
| H  | 7.88309900  | 2.43431500  | -0.81293700 |
| C  | 2.53312600  | -0.75730200 | 0.47792100  |
| S  | 1.41922000  | 0.38832400  | 1.19320600  |
| C  | 2.53527300  | -2.49432200 | -1.40471400 |
| H  | 1.97319700  | -3.42953100 | -1.37110500 |

|   |             |             |             |
|---|-------------|-------------|-------------|
| H | 2.56222100  | -2.15816200 | -2.44555700 |
| H | 3.55932600  | -2.69674200 | -1.09370400 |
| H | -1.35616400 | 2.47333200  | 0.65887600  |
| C | -3.19424600 | -2.63119600 | 3.36271500  |
| H | -2.93010400 | -1.99656500 | 4.21729300  |
| H | -4.21286200 | -3.00681300 | 3.50990100  |
| O | -2.26166700 | -3.72306500 | 3.25667600  |
| H | -2.12121400 | -4.08445300 | 4.13792500  |

**IM5a**

|   |             |             |             |
|---|-------------|-------------|-------------|
| C | -4.51402100 | -0.47879800 | -1.09367500 |
| C | -4.44885400 | -0.75443600 | -2.42502500 |
| H | -5.26071800 | -0.65423800 | -3.12898900 |
| C | -3.12051800 | -1.21774400 | -2.69200000 |
| C | -1.05033900 | -1.65445200 | -1.16629600 |
| C | -2.45941200 | -1.19501900 | -1.50352600 |
| O | -3.29691600 | -0.74285400 | -0.51518300 |
| O | -0.48474100 | -2.26758200 | -2.21803500 |
| H | -2.69828200 | -1.55711700 | -3.62263300 |
| C | -0.11185300 | -0.46923100 | -0.84979000 |
| C | 1.08678700  | 1.33426100  | -0.05477500 |
| N | -0.07179500 | 0.53678000  | 0.02813700  |
| C | 3.24680700  | 1.47988700  | -1.44628400 |
| C | 4.40369600  | 0.72021100  | -0.79268900 |
| H | 3.31617800  | 2.53329100  | -1.16735200 |
| H | 3.37287800  | 1.43743600  | -2.53184000 |
| H | 4.31648500  | 0.75609300  | 0.29779300  |
| C | -1.13662200 | 0.81941000  | 1.01773000  |
| H | -1.80144200 | -0.03978200 | 1.02759500  |
| H | -0.66009500 | 0.87675900  | 1.99634000  |
| H | 4.39758100  | -0.32640000 | -1.10919000 |
| O | 5.61194800  | 1.37317300  | -1.21364400 |
| C | 6.84700800  | 0.87916800  | -0.90832100 |
| O | 7.81277200  | 1.50749100  | -1.24627700 |
| C | -1.92250900 | 2.08055100  | 0.71357800  |
| C | -2.37640200 | 2.86702400  | 1.77682200  |
| C | -2.25438400 | 2.45153600  | -0.59231700 |
| C | -3.14911200 | 4.00291700  | 1.54194600  |
| H | -2.12175300 | 2.59059700  | 2.79519400  |
| C | -3.01890900 | 3.59234800  | -0.82877100 |
| H | -1.92409700 | 1.84832600  | -1.43051200 |
| C | -3.46933500 | 4.37093900  | 0.23635700  |
| H | -3.49284500 | 4.60306700  | 2.37704900  |
| H | -3.26668900 | 3.86871600  | -1.84736100 |

|   |             |             |             |
|---|-------------|-------------|-------------|
| H | -4.06378300 | 5.25814400  | 0.05016800  |
| C | 6.91727200  | -0.44151600 | -0.17265800 |
| H | 6.36326400  | -0.40838700 | 0.76873100  |
| H | 6.49238600  | -1.24653800 | -0.77842000 |
| H | 7.96257500  | -0.66221400 | 0.02968600  |
| C | 1.90838600  | 0.92141500  | -1.05695300 |
| S | 1.24472800  | -0.47979500 | -1.88299200 |
| C | 1.31654500  | 2.43995400  | 0.92658400  |
| H | 0.51734900  | 3.18360100  | 0.89644700  |
| H | 1.38186000  | 2.04062100  | 1.94292900  |
| H | 2.25591200  | 2.94393400  | 0.70156400  |
| C | -1.11665500 | -2.72422700 | 0.09043000  |
| O | -1.18212600 | -3.97177600 | -0.53351500 |
| C | 0.05555600  | -2.65915200 | 1.01732800  |
| C | 1.27668400  | -3.26337400 | 1.03069800  |
| O | -0.05561400 | -1.82427600 | 2.10119200  |
| C | 1.96620300  | -2.76285800 | 2.18180500  |
| H | 1.62136600  | -3.98732700 | 0.31119600  |
| C | 1.12202000  | -1.89202300 | 2.80187300  |
| H | 2.95712900  | -3.02887700 | 2.51746600  |
| H | -2.02737400 | -2.53429900 | 0.66657400  |
| H | -0.85783000 | -3.76174000 | -1.45105100 |
| C | -5.58980200 | 0.04089400  | -0.21705300 |
| H | -6.40764300 | 0.38888100  | -0.85923100 |
| H | -5.21759300 | 0.89747100  | 0.35976700  |
| O | -6.04187900 | -0.99224900 | 0.67121900  |
| H | -6.63480400 | -0.59555600 | 1.31772000  |
| C | 1.21133300  | -1.10632300 | 4.05134600  |
| H | 2.13023500  | -1.39338700 | 4.57292100  |
| H | 0.35675600  | -1.33182200 | 4.70131100  |
| O | 1.22196300  | 0.31135200  | 3.75610900  |
| H | 1.17924000  | 0.78561400  | 4.59393300  |

#### TS4a

|   |             |             |             |
|---|-------------|-------------|-------------|
| C | -4.38064900 | -0.33572600 | -1.36380600 |
| C | -4.26235400 | -0.61591400 | -2.69205200 |
| H | -4.98261600 | -0.36508400 | -3.45545000 |
| C | -3.02629200 | -1.31566000 | -2.85961300 |
| C | -1.20952300 | -2.07357500 | -1.16473600 |
| C | -2.47115800 | -1.41550800 | -1.61968700 |
| O | -3.28695800 | -0.81975900 | -0.69524100 |
| O | -0.50037100 | -2.62978400 | -2.03757000 |
| H | -2.59789200 | -1.71346100 | -3.76467500 |
| C | -0.11298700 | -0.43016600 | -0.65040000 |

|   |              |              |              |
|---|--------------|--------------|--------------|
| C | 1. 13381400  | 1. 42283400  | 0. 05902300  |
| N | -0. 01857200 | 0. 61648700  | 0. 17717200  |
| C | 3. 25681000  | 1. 54355500  | -1. 39659800 |
| C | 4. 43946000  | 0. 74229400  | -0. 84908200 |
| H | 3. 35923300  | 2. 58216100  | -1. 07507900 |
| H | 3. 31661700  | 1. 54938700  | -2. 48857900 |
| H | 4. 41995100  | 0. 73526000  | 0. 24506600  |
| C | -1. 08412700 | 0. 91050700  | 1. 15743400  |
| H | -1. 75042200 | 0. 05005100  | 1. 14222600  |
| H | -0. 62917000 | 0. 95815200  | 2. 14782600  |
| H | 4. 39836000  | -0. 29031500 | -1. 20652600 |
| O | 5. 63054600  | 1. 39429200  | -1. 32033100 |
| C | 6. 87480500  | 0. 88988100  | -1. 08031800 |
| O | 7. 82805600  | 1. 50938900  | -1. 46748600 |
| C | -1. 86635500 | 2. 17384100  | 0. 85094400  |
| C | -2. 38596200 | 2. 92456600  | 1. 91037400  |
| C | -2. 13066800 | 2. 58338500  | -0. 45914000 |
| C | -3. 15626500 | 4. 06054200  | 1. 66828600  |
| H | -2. 18466100 | 2. 61938700  | 2. 93254200  |
| C | -2. 89208600 | 3. 72540100  | -0. 70264200 |
| H | -1. 74334200 | 2. 01112900  | -1. 29425100 |
| C | -3. 40882200 | 4. 46658900  | 0. 35890700  |
| H | -3. 55070100 | 4. 63181000  | 2. 50126900  |
| H | -3. 08399100 | 4. 03313600  | -1. 72443500 |
| H | -4. 00040600 | 5. 35465600  | 0. 16755400  |
| C | 6. 97168600  | -0. 43016800 | -0. 34650300 |
| H | 6. 47478700  | -0. 38554100 | 0. 62572000  |
| H | 6. 50029000  | -1. 23126800 | -0. 92206000 |
| H | 8. 02422300  | -0. 66405100 | -0. 20512800 |
| C | 1. 93431600  | 0. 99037500  | -0. 95010800 |
| S | 1. 24471400  | -0. 43798000 | -1. 70057100 |
| C | 1. 38325400  | 2. 54273500  | 1. 01932800  |
| H | 0. 58579600  | 3. 28862700  | 0. 99212000  |
| H | 1. 45746800  | 2. 15512800  | 2. 03992400  |
| H | 2. 32196400  | 3. 04197300  | 0. 77999700  |
| C | -1. 32230400 | -2. 83586000 | 0. 20893800  |
| O | -1. 65237700 | -4. 17752300 | -0. 12803600 |
| C | -0. 08130100 | -2. 77050800 | 1. 04431800  |
| C | 1. 16013300  | -3. 32226100 | 0. 94508000  |
| O | -0. 14710000 | -1. 98684700 | 2. 16706500  |
| C | 1. 91128800  | -2. 83700200 | 2. 06184800  |
| H | 1. 49323800  | -3. 98569000 | 0. 16400000  |
| C | 1. 07991500  | -2. 02597500 | 2. 77488500  |
| H | 2. 93564700  | -3. 06858600 | 2. 31133600  |

|   |             |             |             |
|---|-------------|-------------|-------------|
| H | -2.14899500 | -2.43508300 | 0.79783100  |
| H | -1.19599900 | -4.35173400 | -0.96636000 |
| C | -5.41505500 | 0.36298200  | -0.56400500 |
| H | -6.08345200 | 0.88656900  | -1.25795400 |
| H | -4.93714100 | 1.10939600  | 0.08245800  |
| O | -6.14462200 | -0.58641100 | 0.22755600  |
| H | -6.67388500 | -0.10097200 | 0.86853000  |
| C | 1.23769300  | -1.27425300 | 4.03923800  |
| H | 2.18812100  | -1.56874200 | 4.49646500  |
| H | 0.42505300  | -1.52774800 | 4.73099200  |
| O | 1.22314200  | 0.15090100  | 3.78698800  |
| H | 1.21038000  | 0.59822300  | 4.64053900  |

### IM6a

|   |             |             |             |
|---|-------------|-------------|-------------|
| C | 3.12398600  | -2.26927700 | -1.92377100 |
| C | 4.00316800  | -2.36956600 | -2.97167600 |
| H | 4.02531300  | -3.16518100 | -3.69936000 |
| C | 4.86818100  | -1.25082000 | -2.88895100 |
| C | 5.02259600  | 0.67192100  | -1.20007400 |
| C | 4.46930700  | -0.52933600 | -1.79171900 |
| O | 3.39189900  | -1.14985000 | -1.20236600 |
| O | 6.01632900  | 1.21389800  | -1.66393700 |
| H | 5.69480100  | -0.99490300 | -3.53227600 |
| C | -1.17382100 | -1.43711100 | -0.91843600 |
| C | -2.52061200 | -0.36121300 | 0.72755900  |
| N | -1.25298100 | -0.64153800 | 0.16621900  |
| C | -4.99827000 | -0.91694000 | 0.27505400  |
| C | -5.69209400 | 0.07134300  | -0.66352000 |
| H | -5.20869300 | -0.62568800 | 1.30694800  |
| H | -5.44678800 | -1.90419400 | 0.13323700  |
| H | -5.28777100 | 1.07792300  | -0.51872600 |
| C | -0.01230700 | -0.10773500 | 0.75510900  |
| H | 0.72744400  | -0.14138800 | -0.04597400 |
| H | -0.15906300 | 0.94037800  | 1.01721000  |
| H | -5.53761400 | -0.22131600 | -1.70587000 |
| O | -7.09179100 | 0.04671300  | -0.33540700 |
| C | -8.00895600 | 0.77981600  | -1.02785400 |
| O | -9.15824100 | 0.73609000  | -0.68114200 |
| C | 0.49535400  | -0.88329400 | 1.95851600  |
| C | 1.35373600  | -0.24192400 | 2.85960900  |
| C | 0.18113700  | -2.22993800 | 2.16742500  |
| C | 1.89277500  | -0.93460100 | 3.94128400  |
| H | 1.60212700  | 0.80326000  | 2.70758300  |
| C | 0.71809600  | -2.92175700 | 3.25504600  |

|   |             |             |             |
|---|-------------|-------------|-------------|
| H | -0.48792900 | -2.74199500 | 1.48550900  |
| C | 1.57680400  | -2.27805900 | 4.14292600  |
| H | 2.55931500  | -0.42409300 | 4.62757000  |
| H | 0.46502500  | -3.96568600 | 3.40269500  |
| H | 1.99546200  | -2.81727500 | 4.98493800  |
| C | -7.51665100 | 1.60133800  | -2.20021700 |
| H | -6.75296000 | 2.31949200  | -1.89121900 |
| H | -7.07614700 | 0.96199800  | -2.96973600 |
| H | -8.36528200 | 2.13542100  | -2.62103300 |
| C | -3.51730000 | -0.97585200 | 0.04221200  |
| S | -2.79934800 | -1.88590500 | -1.28726900 |
| C | -2.64154200 | 0.52688100  | 1.92733200  |
| H | -2.06547900 | 0.13505900  | 2.77035200  |
| H | -2.27077500 | 1.53365300  | 1.71379200  |
| H | -3.68308000 | 0.60585900  | 2.23926800  |
| C | 4.37186300  | 1.29772600  | 0.05086200  |
| O | 5.34566100  | 2.05639800  | 0.74677700  |
| C | 3.19859200  | 2.14772800  | -0.34748400 |
| C | 2.72235300  | 2.62355700  | -1.53224000 |
| O | 2.45204400  | 2.64679700  | 0.68354300  |
| C | 1.61323000  | 3.47071300  | -1.21311900 |
| H | 3.11650900  | 2.40726900  | -2.51236700 |
| C | 1.49308300  | 3.45944800  | 0.14309800  |
| H | 0.99271000  | 4.02203700  | -1.90228900 |
| H | 4.02994800  | 0.50832400  | 0.72649200  |
| H | 5.99081100  | 2.33627800  | 0.07728100  |
| C | 2.00200100  | -3.14184000 | -1.46640500 |
| H | 1.89928900  | -3.95512000 | -2.18776600 |
| H | 1.05920800  | -2.58013500 | -1.45354900 |
| O | 2.25990500  | -3.74376600 | -0.19623100 |
| H | 1.93731900  | -3.15883700 | 0.49906800  |
| C | 0.60062300  | 4.17557800  | 1.08594000  |
| H | 0.03113600  | 4.92225400  | 0.52277400  |
| H | 1.20506100  | 4.69560500  | 1.83773800  |
| O | -0.29550300 | 3.25270400  | 1.73764600  |
| H | -0.54388500 | 3.62365500  | 2.59037500  |

### IM1b

|   |             |            |             |
|---|-------------|------------|-------------|
| C | -1.47337300 | 4.12235500 | -0.69097800 |
| C | -1.60892700 | 3.55580100 | -1.92946900 |
| H | -2.28989000 | 3.88050500 | -2.69797100 |
| C | -0.67978900 | 2.48380100 | -1.96712400 |
| C | 0.99352800  | 1.59648400 | -0.27033000 |
| H | 1.29050100  | 0.80479600 | -0.97689800 |

|   |             |             |             |
|---|-------------|-------------|-------------|
| C | -0.03938600 | 2.46850600  | -0.75174500 |
| O | -0.52933600 | 3.48547500  | 0.03454700  |
| O | 1.55045000  | 1.70515800  | 0.82592900  |
| H | -0.48535700 | 1.80107100  | -2.78014200 |
| N | 3.58797000  | 0.11439600  | 1.75249400  |
| C | 3.57268200  | 0.74892800  | 3.12573400  |
| H | 3.95931900  | 1.76010400  | 2.98972100  |
| H | 2.52078600  | 0.84682300  | 3.39567400  |
| C | 4.77108100  | 0.49272900  | 0.88068500  |
| H | 4.49928300  | 0.14014700  | -0.11923900 |
| H | 4.78270600  | 1.58445500  | 0.86139000  |
| C | 3.30769300  | -1.37100800 | 1.73372700  |
| H | 3.38026900  | -1.66275600 | 0.68253100  |
| H | 4.10095400  | -1.86456200 | 2.29525200  |
| C | 4.33151800  | 0.01550900  | 4.22553300  |
| H | 5.39183600  | -0.10493700 | 4.00598300  |
| H | 4.24824400  | 0.60527600  | 5.14198600  |
| H | 3.90789900  | -0.96824500 | 4.43344900  |
| C | 6.12682600  | -0.06231400 | 1.29188100  |
| H | 6.83939700  | 0.19826400  | 0.50568600  |
| H | 6.50265500  | 0.35854200  | 2.22630500  |
| H | 6.12245100  | -1.15106000 | 1.36710200  |
| C | 1.92791600  | -1.71529800 | 2.27703200  |
| H | 1.78856200  | -2.79531400 | 2.18687100  |
| H | 1.80628300  | -1.45606600 | 3.33194200  |
| H | 1.13243600  | -1.23708000 | 1.69945200  |
| H | 2.77805900  | 0.57978800  | 1.27028500  |
| C | -2.15645100 | 5.26699400  | -0.02313200 |
| H | -2.68382600 | 4.89910700  | 0.86819800  |
| H | -1.40057900 | 5.99030100  | 0.31350800  |
| O | -3.05355200 | 5.84426600  | -0.96049900 |
| H | -3.56107900 | 6.53253300  | -0.52144400 |
| C | -1.35615700 | -1.03371900 | 0.42789100  |
| C | -3.11859700 | -2.28901900 | -0.55414000 |
| N | -1.76435000 | -1.93444600 | -0.49890600 |
| C | -5.28792800 | -1.72498500 | 0.64356400  |
| C | -0.78320600 | -2.53214200 | -1.42221100 |
| H | 0.17973900  | -2.05116000 | -1.26718800 |
| H | -0.69052200 | -3.60382700 | -1.23414100 |
| C | -3.84463100 | -1.62258300 | 0.39262600  |
| S | -2.75906000 | -0.57956400 | 1.30853000  |
| C | -3.60384600 | -3.28172900 | -1.56060700 |
| H | -3.42654200 | -2.92169800 | -2.57879500 |
| H | -3.07258800 | -4.23247300 | -1.45575100 |

|   |             |             |             |
|---|-------------|-------------|-------------|
| H | -4.66889000 | -3.45288600 | -1.42903000 |
| H | -1.09115800 | -2.37530000 | -2.45682600 |
| O | -5.66000500 | -0.91387600 | 1.66002800  |
| C | -7.05778500 | -0.92940300 | 1.99880800  |
| H | -7.36438900 | -1.92934000 | 2.30880500  |
| H | -7.66093500 | -0.61805700 | 1.14487000  |
| H | -7.16286500 | -0.22442000 | 2.82041300  |
| O | -6.07158800 | -2.42914600 | 0.04285100  |
| I | 2.97532300  | -1.16957800 | -2.18552700 |

**TS1b**

|   |             |             |             |
|---|-------------|-------------|-------------|
| C | -1.60937700 | 4.10719700  | 0.07395000  |
| C | -1.09450400 | 4.25513600  | -1.18161900 |
| H | -1.31232100 | 5.06124200  | -1.86481200 |
| C | -0.22505800 | 3.14411800  | -1.39721000 |
| C | 0.46124100  | 1.17228500  | 0.11429000  |
| H | 1.07742800  | 0.78440700  | -0.70570500 |
| C | -0.26956500 | 2.39617400  | -0.25286600 |
| O | -1.10375300 | 2.97970200  | 0.65297800  |
| O | 0.76685400  | 0.92960700  | 1.31369000  |
| H | 0.37432700  | 2.92663300  | -2.26785100 |
| C | -1.15261100 | -0.21169400 | -0.37976800 |
| C | -2.84644300 | -1.44643600 | -1.43017900 |
| N | -1.65243300 | -0.72063900 | -1.51880500 |
| C | -4.49641700 | -2.18630900 | 0.36124500  |
| C | -0.96428800 | -0.49931600 | -2.80561400 |
| H | 0.08144400  | -0.26384600 | -2.61030000 |
| H | -0.99666500 | -1.41013700 | -3.40067200 |
| N | 3.00783000  | -0.31072000 | 1.97117100  |
| C | 2.86049300  | -0.16454100 | 3.46605900  |
| H | 2.98809000  | 0.89869800  | 3.67565600  |
| H | 1.81923300  | -0.40331800 | 3.68713200  |
| C | 4.04832400  | 0.58721600  | 1.33609500  |
| H | 3.88032700  | 0.49233200  | 0.25905600  |
| H | 3.77752200  | 1.60302800  | 1.63149200  |
| C | 3.09780000  | -1.73066800 | 1.47420900  |
| H | 3.23125900  | -1.65384100 | 0.39140300  |
| H | 3.99023900  | -2.18812700 | 1.90255800  |
| C | 3.78672200  | -1.00824500 | 4.33565400  |
| H | 4.84212200  | -0.80483400 | 4.15746900  |
| H | 3.57602100  | -0.77268700 | 5.38205300  |
| H | 3.61593900  | -2.07795500 | 4.20390600  |
| C | 5.50464200  | 0.29272200  | 1.66660500  |
| H | 6.12254500  | 0.94246700  | 1.04219800  |



|   |             |             |             |
|---|-------------|-------------|-------------|
| H | 5.76031200  | 0.49941900  | 2.70756200  |
| H | 5.78471200  | -0.73490700 | 1.42752200  |
| C | 1.84761800  | -2.54287100 | 1.78534700  |
| H | 1.94897300  | -3.52344500 | 1.31501000  |
| H | 1.69118500  | -2.70100200 | 2.85540600  |
| H | 0.95801800  | -2.06669600 | 1.36852500  |
| C | -3.28677700 | -1.51110500 | -0.13748400 |
| S | -2.18142600 | -0.63911800 | 0.91385900  |
| C | -3.47163800 | -2.03746300 | -2.65125900 |
| H | -3.61432300 | -1.27500000 | -3.42201400 |
| H | -2.83322300 | -2.81951500 | -3.07441500 |
| H | -4.43304100 | -2.47586900 | -2.39737200 |
| H | 2.08266800  | 0.09456300  | 1.60030000  |
| C | -2.56765500 | 4.90963300  | 0.87250200  |
| H | -2.19405300 | 5.00299400  | 1.89937900  |
| H | -2.63008800 | 5.91158300  | 0.43207300  |
| O | -3.85486200 | 4.27329900  | 0.86634700  |
| H | -4.39596800 | 4.68034500  | 1.55064100  |
| H | -1.44841300 | 0.31387800  | -3.35026400 |
| O | -4.60922600 | -2.04108300 | 1.69802100  |
| C | -5.76210700 | -2.65310900 | 2.30670300  |
| H | -5.75498900 | -3.73017900 | 2.13561100  |
| H | -6.67833300 | -2.22795400 | 1.89549700  |
| H | -5.67814800 | -2.43133700 | 3.36793400  |
| O | -5.29732900 | -2.79586400 | -0.31249800 |
| I | 3.00766700  | -0.64541800 | -2.31455700 |

## IM2b

|   |             |             |             |
|---|-------------|-------------|-------------|
| C | 0.59700200  | 3.66302700  | -1.90297000 |
| C | -0.49421700 | 4.08359800  | -1.20317000 |
| H | -0.88951800 | 5.08734500  | -1.18950800 |
| C | -0.99116300 | 2.94752500  | -0.48876900 |
| C | -0.17470700 | 0.46790100  | -0.41556000 |
| H | -0.85465600 | 0.38105200  | 0.46334000  |
| C | -0.16985000 | 1.91136300  | -0.80984600 |
| O | 0.80723200  | 2.33123400  | -1.67267400 |
| O | -0.54872500 | -0.40030600 | -1.46453900 |
| H | -1.82392500 | 2.89490800  | 0.19600000  |
| C | 1.18325900  | 0.01298400  | 0.03427700  |
| C | 3.16295500  | -0.11449200 | 1.19285000  |
| N | 1.92828500  | 0.51289500  | 1.02765300  |
| C | 4.48834800  | -2.03666100 | 0.16365500  |
| C | 1.46790500  | 1.63852200  | 1.87391200  |
| H | 0.40800600  | 1.50044600  | 2.10542600  |

|   |              |              |              |
|---|--------------|--------------|--------------|
| H | 2. 02685900  | 1. 62235600  | 2. 80422000  |
| N | -3. 06449500 | -1. 43238400 | -1. 31370100 |
| C | -3. 07961400 | -2. 03274800 | -2. 66632800 |
| H | -3. 06689400 | -1. 20138400 | -3. 37716700 |
| H | -2. 12802500 | -2. 55725600 | -2. 80173600 |
| C | -3. 90432900 | -0. 22252300 | -1. 14854600 |
| H | -3. 62952400 | 0. 20707200  | -0. 18077700 |
| H | -3. 58851900 | 0. 49110300  | -1. 91698000 |
| C | -3. 22821800 | -2. 39214900 | -0. 20034600 |
| H | -3. 20993300 | -1. 80671400 | 0. 72231400  |
| H | -4. 20540800 | -2. 89287100 | -0. 24473600 |
| C | -4. 21554100 | -3. 00233100 | -3. 02688100 |
| H | -5. 20028200 | -2. 53703000 | -2. 97859700 |
| H | -4. 06466800 | -3. 35948100 | -4. 05025800 |
| H | -4. 22644100 | -3. 87944100 | -2. 37547700 |
| C | -5. 43149800 | -0. 37537000 | -1. 19652200 |
| H | -5. 88893300 | 0. 58001000  | -0. 92326100 |
| H | -5. 79806500 | -0. 64261600 | -2. 18994700 |
| H | -5. 78955700 | -1. 12064100 | -0. 48250300 |
| C | -2. 12377500 | -3. 44571600 | -0. 13723900 |
| H | -2. 26377200 | -4. 06032200 | 0. 75556900  |
| H | -2. 12630300 | -4. 11397100 | -1. 00281500 |
| H | -1. 13887000 | -2. 97787000 | -0. 06883400 |
| C | 3. 32666200  | -1. 13354300 | 0. 29478500  |
| S | 1. 93382600  | -1. 29435600 | -0. 75340900 |
| C | 4. 11391600  | 0. 33774800  | 2. 25081800  |
| H | 4. 32620800  | 1. 40557700  | 2. 15201600  |
| H | 3. 69612400  | 0. 16605100  | 3. 24745500  |
| H | 5. 04189800  | -0. 22060700 | 2. 16436000  |
| H | -1. 48072300 | -0. 76895500 | -1. 31120600 |
| C | 1. 55420800  | 4. 35288600  | -2. 80053600 |
| H | 1. 68797300  | 3. 76690900  | -3. 71827700 |
| H | 1. 13156900  | 5. 32776300  | -3. 06872600 |
| O | 2. 81257800  | 4. 50999100  | -2. 12507800 |
| H | 3. 46242400  | 4. 81876600  | -2. 76498200 |
| H | 1. 63847900  | 2. 57873000  | 1. 34844000  |
| O | 4. 27535500  | -2. 93399500 | -0. 81636000 |
| C | 5. 33408600  | -3. 88657300 | -1. 05309700 |
| H | 5. 51603200  | -4. 47663700 | -0. 15475600 |
| H | 6. 24870100  | -3. 36783800 | -1. 34095200 |
| H | 4. 97573300  | -4. 51652400 | -1. 86312500 |
| O | 5. 49495400  | -1. 98965200 | 0. 83131700  |
| I | -2. 13202700 | 0. 45357200  | 2. 74562500  |

**IM5b**

|   |              |              |              |
|---|--------------|--------------|--------------|
| C | 4. 05156800  | -1. 50639000 | 0. 74918500  |
| C | 4. 07480500  | -2. 51069100 | -0. 16852000 |
| H | 4. 81473800  | -3. 29451600 | -0. 22484000 |
| C | 2. 95777500  | -2. 30752600 | -1. 04045000 |
| C | 1. 12568600  | -0. 45657200 | -1. 18825900 |
| C | 2. 32415300  | -1. 18802800 | -0. 59865600 |
| O | 2. 97674500  | -0. 68717700 | 0. 50050300  |
| O | 0. 72615800  | -1. 04351600 | -2. 32780600 |
| H | 2. 65736400  | -2. 88260900 | -1. 89917300 |
| C | 1. 53731400  | 1. 09197700  | -1. 51365800 |
| O | 2. 04466000  | 1. 04519300  | -2. 81600400 |
| C | 0. 39012100  | 2. 04885600  | -1. 41528700 |
| C | -0. 58248200 | 2. 45254400  | -2. 27845900 |
| O | 0. 21225600  | 2. 66642400  | -0. 20300300 |
| C | -1. 42247400 | 3. 35871100  | -1. 55284600 |
| H | -0. 67539100 | 2. 14196000  | -3. 30522700 |
| C | -0. 90413800 | 3. 45778200  | -0. 29832000 |
| H | -2. 29606200 | 3. 87632600  | -1. 91929300 |
| H | 2. 31986800  | 1. 41362400  | -0. 81899800 |
| H | 1. 63688700  | 0. 21473900  | -3. 17195700 |
| C | 4. 92261400  | -1. 16247100 | 1. 89744600  |
| H | 5. 58082100  | -2. 01866300 | 2. 08882700  |
| H | 4. 31074900  | -0. 99373200 | 2. 79410500  |
| O | 5. 68843200  | 0. 01346000  | 1. 59675600  |
| H | 6. 17945300  | 0. 26495800  | 2. 38646600  |
| C | -1. 26905100 | 4. 25121900  | 0. 89647500  |
| H | -2. 10310100 | 4. 90927700  | 0. 62839500  |
| H | -0. 42152200 | 4. 87226100  | 1. 21434800  |
| O | -1. 64439600 | 3. 37255800  | 1. 98350600  |
| H | -1. 87498100 | 3. 92346500  | 2. 74073700  |
| C | -0. 08978300 | -0. 55684100 | -0. 24284700 |
| C | -1. 66954700 | -0. 52234000 | 1. 43237100  |
| N | -0. 38092000 | -0. 18158700 | 1. 01312700  |
| C | -3. 71774800 | -1. 72797600 | 0. 53461300  |
| C | 0. 53475700  | 0. 55132300  | 1. 90739500  |
| H | 1. 47065100  | 0. 73212100  | 1. 39552600  |
| H | 0. 06938700  | 1. 49541400  | 2. 18437600  |
| C | -2. 34667100 | -1. 18748300 | 0. 44746000  |
| S | -1. 37370300 | -1. 36660400 | -1. 00791400 |
| C | -2. 13996100 | -0. 12790900 | 2. 79326800  |
| H | -1. 50056400 | -0. 55948800 | 3. 57145200  |
| H | -2. 11626800 | 0. 96167300  | 2. 89688400  |
| H | -3. 15636400 | -0. 48186800 | 2. 94046900  |

|   |             |             |             |
|---|-------------|-------------|-------------|
| H | 0.72554800  | -0.05780900 | 2.79126900  |
| O | -4.08882100 | -2.26994200 | -0.64218300 |
| C | -5.39949100 | -2.86817400 | -0.69004000 |
| H | -6.15837800 | -2.13267500 | -0.41835300 |
| H | -5.45305200 | -3.71605500 | -0.00473100 |
| H | -5.53059200 | -3.19561400 | -1.71895200 |
| O | -4.42730800 | -1.70651100 | 1.51550500  |

**TS4b**

|   |             |             |             |
|---|-------------|-------------|-------------|
| C | 3.88826300  | -1.71719900 | 0.72104700  |
| C | 3.90287800  | -2.68276900 | -0.24015400 |
| H | 4.52588500  | -3.56383500 | -0.23878100 |
| C | 2.96016400  | -2.28688600 | -1.23919600 |
| C | 1.42837800  | -0.20405500 | -1.47121400 |
| C | 2.43093200  | -1.10367600 | -0.82102500 |
| O | 2.98674900  | -0.74318300 | 0.37825200  |
| O | 0.94348400  | -0.58388700 | -2.56428100 |
| H | 2.70450400  | -2.78933400 | -2.15726000 |
| C | 1.73509000  | 1.33138400  | -1.35688200 |
| O | 2.51450600  | 1.65520100  | -2.50296500 |
| C | 0.50118700  | 2.17464200  | -1.26197700 |
| C | -0.52920700 | 2.45399500  | -2.10799700 |
| O | 0.29754500  | 2.81080700  | -0.06483800 |
| C | -1.43280400 | 3.29559400  | -1.38524000 |
| H | -0.63440900 | 2.08534200  | -3.11503300 |
| C | -0.89316400 | 3.48247000  | -0.14816300 |
| H | -2.36532600 | 3.70874900  | -1.73814900 |
| H | 2.35300700  | 1.53508800  | -0.48112400 |
| H | 2.16025800  | 1.10806100  | -3.22080900 |
| C | 4.63417200  | -1.54509200 | 1.99049300  |
| H | 5.11212900  | -2.50137300 | 2.23400000  |
| H | 3.93624200  | -1.29410900 | 2.80068100  |
| O | 5.61284500  | -0.50658700 | 1.84459600  |
| H | 5.99959900  | -0.33035400 | 2.70863800  |
| C | -1.31460100 | 4.25878800  | 1.03879800  |
| H | -2.18421500 | 4.86402200  | 0.76233300  |
| H | -0.50759300 | 4.93092300  | 1.35602700  |
| O | -1.64697800 | 3.36490500  | 2.12619500  |
| H | -1.81234400 | 3.90196000  | 2.90876300  |
| C | -0.11182100 | -0.42271300 | -0.15999900 |
| C | -1.80324000 | -0.63396800 | 1.43945100  |
| N | -0.51403000 | -0.20886700 | 1.10468900  |
| C | -3.75765800 | -1.82042900 | 0.33099100  |
| C | 0.34934300  | 0.46945700  | 2.08715400  |

|   |              |              |              |
|---|--------------|--------------|--------------|
| H | 1. 33513600  | 0. 57941300  | 1. 64855200  |
| H | -0. 06934000 | 1. 44678900  | 2. 32622700  |
| C | -2. 40489500 | -1. 23692200 | 0. 37005000  |
| S | -1. 34506200 | -1. 22541600 | -1. 02755200 |
| C | -2. 35380200 | -0. 37526500 | 2. 80295100  |
| H | -1. 76136300 | -0. 88361700 | 3. 57030400  |
| H | -2. 33318200 | 0. 69778200  | 3. 01546600  |
| H | -3. 37786600 | -0. 73433700 | 2. 85934400  |
| H | 0. 42264200  | -0. 14269100 | 2. 98717400  |
| O | -4. 03060700 | -2. 31601000 | -0. 89270600 |
| C | -5. 32774600 | -2. 91868400 | -1. 06057400 |
| H | -6. 11336100 | -2. 18706700 | -0. 86795400 |
| H | -5. 44478700 | -3. 76266800 | -0. 37967400 |
| H | -5. 35733800 | -3. 25192500 | -2. 09523400 |
| O | -4. 53727900 | -1. 86376400 | 1. 25742800  |

### IM6b

|   |              |              |              |
|---|--------------|--------------|--------------|
| C | 2. 32136300  | -2. 86476700 | -0. 67551800 |
| C | 3. 46384000  | -3. 58225000 | -0. 92336200 |
| H | 3. 50729200  | -4. 55335300 | -1. 39027600 |
| C | 4. 54643500  | -2. 81070700 | -0. 43197700 |
| C | 4. 61594900  | -0. 52586600 | 0. 74104100  |
| C | 4. 00121000  | -1. 66445500 | 0. 08948700  |
| O | 2. 63534500  | -1. 69563400 | -0. 06331000 |
| O | 5. 82162700  | -0. 46767900 | 0. 94011600  |
| H | 5. 59765100  | -3. 05056800 | -0. 44055800 |
| C | 3. 73963200  | 0. 65720500  | 1. 20049700  |
| O | 4. 44780400  | 1. 41630500  | 2. 16387700  |
| C | 3. 33669000  | 1. 48895200  | 0. 01867200  |
| C | 3. 85054800  | 1. 67121400  | -1. 22999900 |
| O | 2. 26850400  | 2. 32118200  | 0. 20502000  |
| C | 3. 05037900  | 2. 67887900  | -1. 85429200 |
| H | 4. 69957600  | 1. 15685500  | -1. 65155700 |
| C | 2. 10597200  | 3. 04550600  | -0. 94428200 |
| H | 3. 16301300  | 3. 08023300  | -2. 84936400 |
| H | 2. 83442700  | 0. 27269200  | 1. 68000600  |
| H | 5. 38727700  | 1. 21516100  | 2. 01971100  |
| C | 0. 87824600  | -3. 15025200 | -0. 93547600 |
| H | 0. 83009300  | -4. 06765600 | -1. 53657200 |
| H | 0. 45572300  | -2. 33791200 | -1. 54332600 |
| O | 0. 16135000  | -3. 29775100 | 0. 27076200  |
| H | -0. 64442000 | -2. 72096300 | 0. 22419200  |
| C | 1. 02801500  | 4. 06163200  | -0. 96816400 |
| H | 1. 18373200  | 4. 69639000  | -1. 84671700 |

|   |             |             |             |
|---|-------------|-------------|-------------|
| H | 1.08834100  | 4.68830300  | -0.06972800 |
| O | -0.26187700 | 3.42130900  | -1.03007700 |
| H | -0.92960900 | 4.11264300  | -1.09547100 |
| C | -2.07171100 | -1.46533100 | 0.13001900  |
| C | -3.16807000 | 0.56911000  | 0.62305200  |
| N | -1.99178200 | -0.18511200 | 0.55110400  |
| C | -5.65276400 | 0.27120600  | 0.16796300  |
| C | -0.68634400 | 0.40114400  | 0.90529100  |
| H | 0.05983000  | -0.38188900 | 0.80663700  |
| H | -0.45029600 | 1.23033500  | 0.23797100  |
| C | -4.25014700 | -0.16815300 | 0.23244100  |
| S | -3.71800900 | -1.78643600 | -0.20744700 |
| C | -3.12591100 | 1.98814800  | 1.08717800  |
| H | -2.78099500 | 2.04472000  | 2.12472600  |
| H | -2.42523800 | 2.56639500  | 0.47870500  |
| H | -4.11731100 | 2.42885900  | 1.02454800  |
| H | -0.70267400 | 0.75745000  | 1.93664600  |
| O | -6.44837700 | -0.72735800 | -0.26850800 |
| C | -7.85144300 | -0.42142400 | -0.37455800 |
| H | -8.00969100 | 0.39717100  | -1.07766200 |
| H | -8.25422100 | -0.14314500 | 0.60001800  |
| H | -8.31772200 | -1.33465900 | -0.73649100 |
| O | -6.06631400 | 1.37249600  | 0.45935800  |

### IM1<sub>TPT</sub>

|   |             |             |             |
|---|-------------|-------------|-------------|
| O | -1.99297600 | 1.85829300  | -1.32412400 |
| H | -1.18089800 | 1.51404600  | -0.87981400 |
| C | -3.63549300 | 1.28716600  | 0.38787200  |
| C | -3.56226900 | 0.82042100  | 1.67576800  |
| H | -2.89828700 | 1.18574300  | 2.44372900  |
| C | -4.51747900 | -0.22245600 | 1.78113300  |
| C | -6.15477000 | -1.22314900 | 0.09445100  |
| H | -6.49500900 | -1.91819600 | 0.88513600  |
| C | -5.11595900 | -0.32808800 | 0.54795300  |
| O | -4.57826100 | 0.59875000  | -0.30381500 |
| O | -6.64139300 | -1.25265200 | -1.02499300 |
| C | -2.88809200 | 2.35767900  | -0.34099500 |
| H | -2.36991600 | 2.96921200  | 0.40632400  |
| H | -4.74530700 | -0.82638800 | 2.64676000  |
| H | -3.60321500 | 3.00300400  | -0.85945600 |
| C | 2.40925000  | -0.48689600 | -0.01491200 |
| C | 0.59763600  | 0.85654900  | -0.22039900 |
| N | 1.02593700  | -0.44437100 | -0.17609000 |
| N | 1.75637900  | 1.52870000  | -0.07176200 |

|   |              |              |              |
|---|--------------|--------------|--------------|
| N | 2. 87588300  | 0. 72995700  | 0. 04949300  |
| C | 3. 26678100  | -1. 68057500 | 0. 07255900  |
| C | 3. 04842900  | -2. 80823900 | -0. 73071600 |
| C | 4. 35752400  | -1. 66590900 | 0. 95475400  |
| C | 3. 90676500  | -3. 90187700 | -0. 64750900 |
| H | 2. 22351900  | -2. 82891300 | -1. 43160000 |
| C | 5. 21022500  | -2. 76283100 | 1. 03407200  |
| H | 4. 52899300  | -0. 79629900 | 1. 57783000  |
| C | 4. 98590300  | -3. 88465900 | 0. 23545400  |
| H | 3. 73255600  | -4. 76662300 | -1. 27782400 |
| H | 6. 04741300  | -2. 74263100 | 1. 72285300  |
| H | 5. 65015500  | -4. 73941000 | 0. 29898500  |
| C | 1. 92124700  | 2. 94896200  | -0. 05087500 |
| C | 3. 05488200  | 3. 51720200  | -0. 63245500 |
| C | 0. 95428000  | 3. 74951600  | 0. 55634500  |
| C | 3. 21380700  | 4. 90085800  | -0. 60793100 |
| H | 3. 79678200  | 2. 88279500  | -1. 10005400 |
| C | 1. 11888900  | 5. 13281100  | 0. 56464200  |
| H | 0. 09106100  | 3. 29248500  | 1. 02206900  |
| C | 2. 24748200  | 5. 71267000  | -0. 01414300 |
| H | 4. 09342000  | 5. 34359200  | -1. 06152100 |
| H | 0. 36717400  | 5. 75581500  | 1. 03613000  |
| H | 2. 37454700  | 6. 78919200  | -0. 00033800 |
| C | -1. 47235300 | -2. 90776700 | -1. 41718600 |
| C | -1. 61857400 | -3. 72853600 | -0. 29906700 |
| C | -0. 88969400 | -3. 46282600 | 0. 86021300  |
| C | -0. 01590300 | -2. 37828300 | 0. 90574200  |
| C | 0. 12879500  | -1. 57077900 | -0. 22070600 |
| C | -0. 59314200 | -1. 82694700 | -1. 38391000 |
| H | -2. 04033700 | -3. 10725800 | -2. 31871800 |
| H | -2. 30146100 | -4. 57019100 | -0. 33004800 |
| H | -1. 00515300 | -4. 09398000 | 1. 73407800  |
| H | 0. 54561600  | -2. 15736700 | 1. 80591500  |
| H | -0. 46698900 | -1. 18786100 | -2. 24938800 |

**TS1<sub>TPT</sub>**

|   |              |              |              |
|---|--------------|--------------|--------------|
| O | -2. 37985000 | -3. 65560900 | -2. 67267600 |
| H | -2. 73153900 | -2. 95759100 | -3. 23948700 |
| C | -3. 37809300 | -2. 53061300 | -0. 73706700 |
| C | -4. 35497700 | -1. 58289700 | -0. 64332300 |
| H | -5. 30405700 | -1. 59855300 | -1. 15832900 |
| C | -3. 87424600 | -0. 59038300 | 0. 26984300  |
| C | -1. 68292200 | -0. 41343400 | 1. 67191300  |
| H | -2. 08673900 | 0. 56747100  | 1. 98953700  |

|   |             |             |             |
|---|-------------|-------------|-------------|
| C | -2.63485000 | -0.99993000 | 0.67087200  |
| O | -2.32531900 | -2.18354600 | 0.06875700  |
| O | -1.09823700 | -1.14652000 | 2.51064600  |
| C | -3.25594700 | -3.77839100 | -1.53452300 |
| H | -4.25726700 | -4.08596400 | -1.85382000 |
| H | -4.38319700 | 0.30421700  | 0.59517000  |
| H | -2.82937900 | -4.58115400 | -0.93008800 |
| C | 1.67643000  | 1.09417700  | -0.21230200 |
| C | -0.34253400 | 0.45255800  | 0.51657000  |
| N | 0.94232100  | 0.04060500  | 0.33083300  |
| N | -0.32861400 | 1.72030400  | 0.09222900  |
| N | 0.90518900  | 2.13750400  | -0.36449000 |
| C | 3.10526100  | 1.09695400  | -0.57069900 |
| C | 3.72268500  | -0.00017900 | -1.18674900 |
| C | 3.85296400  | 2.25854900  | -0.32506700 |
| C | 5.06674900  | 0.06624100  | -1.54530000 |
| H | 3.15787300  | -0.89783000 | -1.40125700 |
| C | 5.19600200  | 2.31684000  | -0.68420300 |
| H | 3.37965500  | 3.10822100  | 0.15198700  |
| C | 5.80712500  | 1.22050900  | -1.29299500 |
| H | 5.53346200  | -0.78585600 | -2.02637300 |
| H | 5.76546600  | 3.21761200  | -0.48461000 |
| H | 6.85438800  | 1.26606300  | -1.57050500 |
| C | -1.42636600 | 2.65132300  | 0.06421700  |
| C | -2.10258500 | 2.86709800  | -1.13338600 |
| C | -1.76470500 | 3.34359000  | 1.22411400  |
| C | -3.14715000 | 3.78890200  | -1.16498000 |
| H | -1.81270900 | 2.31953900  | -2.02247300 |
| C | -2.81361700 | 4.26067200  | 1.18331900  |
| H | -1.21307700 | 3.16843800  | 2.14013300  |
| C | -3.50330200 | 4.48321900  | -0.00851900 |
| H | -3.68068400 | 3.96359500  | -2.09224600 |
| H | -3.08616300 | 4.80343900  | 2.08115700  |
| H | -4.31659500 | 5.19979200  | -0.03665500 |
| C | 1.61326200  | -3.62050000 | 0.29480100  |
| C | 2.49740100  | -3.73889200 | 1.36651600  |
| C | 2.85839500  | -2.60977900 | 2.10231900  |
| C | 2.33801200  | -1.36167600 | 1.76925500  |
| C | 1.45968700  | -1.25878300 | 0.69429900  |
| C | 1.09189700  | -2.37476200 | -0.04908400 |
| H | 1.32792000  | -4.49606100 | -0.27714800 |
| H | 2.90162900  | -4.70970900 | 1.63082900  |
| H | 3.53913000  | -2.69961300 | 2.94115200  |
| H | 2.60221800  | -0.48025800 | 2.34113100  |



|                          |             |             |             |
|--------------------------|-------------|-------------|-------------|
| H                        | 0.40718400  | -2.27177000 | -0.88098300 |
| <b>IM2<sub>TPT</sub></b> |             |             |             |
| O                        | 1.69511300  | 3.97217700  | -2.66520800 |
| H                        | 2.30410600  | 3.47070600  | -3.22183700 |
| C                        | 2.77700800  | 3.02176000  | -0.67791800 |
| C                        | 3.98656900  | 2.42577300  | -0.47309300 |
| H                        | 4.93871900  | 2.78506100  | -0.83516700 |
| C                        | 3.73814400  | 1.25729400  | 0.31730900  |
| C                        | 1.55409000  | 0.29357300  | 1.42465200  |
| H                        | 2.27276100  | -0.53314100 | 1.64499600  |
| C                        | 2.39239300  | 1.21534100  | 0.54555000  |
| O                        | 1.79743700  | 2.28685100  | -0.05994900 |
| O                        | 0.97981000  | 0.84475200  | 2.48733900  |
| C                        | 2.36433200  | 4.24266900  | -1.41760400 |
| H                        | 3.25166300  | 4.86200500  | -1.58506600 |
| H                        | 4.46365700  | 0.54648300  | 0.68305100  |
| H                        | 1.65112500  | 4.82510900  | -0.83143800 |
| C                        | -1.42504200 | -1.21355300 | -0.26279100 |
| C                        | 0.49152400  | -0.45853300 | 0.55854500  |
| N                        | -0.81361500 | -0.13162500 | 0.36345600  |
| N                        | 0.61983800  | -1.68954000 | 0.05474400  |
| N                        | -0.55859800 | -2.17230700 | -0.45753000 |
| C                        | -2.84353900 | -1.33227200 | -0.64342400 |
| C                        | -3.53399700 | -0.29759000 | -1.28911100 |
| C                        | -3.49811400 | -2.54641500 | -0.38771700 |
| C                        | -4.86199600 | -0.47779400 | -1.66648800 |
| H                        | -3.03887500 | 0.63871200  | -1.51110200 |
| C                        | -4.82664600 | -2.71744800 | -0.76512600 |
| H                        | -2.96718900 | -3.34681400 | 0.11351100  |
| C                        | -5.51189300 | -1.68362600 | -1.40338600 |
| H                        | -5.38711000 | 0.32578500  | -2.17038700 |
| H                        | -5.32699300 | -3.65660500 | -0.55678500 |
| H                        | -6.54766700 | -1.81717400 | -1.69517100 |
| C                        | 1.79636400  | -2.52178200 | 0.01653800  |
| C                        | 2.70590900  | -2.37606000 | -1.02760200 |
| C                        | 1.96657800  | -3.48511800 | 1.00827500  |
| C                        | 3.82253100  | -3.20944600 | -1.06665500 |
| H                        | 2.54149800  | -1.62815300 | -1.79465900 |
| C                        | 3.08663500  | -4.31156200 | 0.95891300  |
| H                        | 1.23748200  | -3.57813000 | 1.80513700  |
| C                        | 4.01357600  | -4.17274700 | -0.07549400 |
| H                        | 4.53984700  | -3.10625800 | -1.87327000 |
| H                        | 3.23379000  | -5.06117500 | 1.72842200  |

|   |             |             |             |
|---|-------------|-------------|-------------|
| H | 4.88428300  | -4.81787500 | -0.11015100 |
| C | -2.09903600 | 3.36440000  | 0.48813200  |
| C | -2.91741800 | 3.30365400  | 1.61465800  |
| C | -3.02588200 | 2.11370200  | 2.33589900  |
| C | -2.31499500 | 0.98608000  | 1.93614300  |
| C | -1.49802500 | 1.06567400  | 0.81238700  |
| C | -1.38724900 | 2.23864800  | 0.07609000  |
| H | -2.01360400 | 4.28609100  | -0.07602800 |
| H | -3.47047500 | 4.18104100  | 1.93091500  |
| H | -3.65828800 | 2.06357600  | 3.21482700  |
| H | -2.38137600 | 0.06114900  | 2.49536900  |
| H | -0.75055100 | 2.27594800  | -0.79740700 |

### IM5<sub>TPT</sub>

|   |             |             |             |
|---|-------------|-------------|-------------|
| O | -4.90252400 | -2.64965800 | -1.68956300 |
| H | -4.65834900 | -3.38857700 | -2.26116900 |
| C | -2.82655400 | -1.55486500 | -2.39648000 |
| C | -2.02743800 | -1.74327600 | -3.48633900 |
| H | -2.36317600 | -1.82753100 | -4.50938100 |
| C | -0.68359800 | -1.82130200 | -3.00415700 |
| C | 0.35785000  | -1.79021900 | -0.60765000 |
| C | -0.74664100 | -1.66664600 | -1.65014200 |
| O | -2.04887300 | -1.50538100 | -1.26871300 |
| O | 1.31864200  | -2.61945100 | -1.03129000 |
| C | -4.29995300 | -1.45883600 | -2.23085900 |
| H | -4.73914900 | -1.21485300 | -3.20438400 |
| H | 0.21320100  | -1.99570100 | -3.57623400 |
| H | -4.55981600 | -0.66351800 | -1.53039700 |
| C | 1.58459100  | 1.73431000  | -0.08873200 |
| C | 1.02286200  | -0.40328100 | -0.32962200 |
| N | 2.33256900  | -0.26046100 | -0.08650000 |
| N | 0.52519400  | 0.86756200  | -0.33205200 |
| H | 1.25712400  | -3.41383600 | 0.36792900  |
| C | -0.26925900 | -2.43376000 | 0.79676500  |
| O | 0.71057500  | -3.34855500 | 1.21385600  |
| C | -0.63583100 | -1.53059300 | 1.92836400  |
| C | 0.08348000  | -0.81448700 | 2.84417200  |
| O | -1.96668400 | -1.44282300 | 2.23446400  |
| C | -0.86000900 | -0.25107200 | 3.75916600  |
| H | 1.15712800  | -0.72020400 | 2.87891700  |
| C | -2.09549800 | -0.65714600 | 3.34925200  |
| H | -0.64983900 | 0.36917600  | 4.61781400  |
| C | -3.46093900 | -0.42922300 | 3.87849400  |
| H | -4.03434200 | -1.36189400 | 3.83767900  |

|   |             |             |             |
|---|-------------|-------------|-------------|
| H | -3.37795900 | -0.12037300 | 4.92591500  |
| O | -4.13127800 | 0.59276500  | 3.10982000  |
| H | -5.06367400 | 0.57834400  | 3.35954300  |
| H | -1.18280300 | -2.95008800 | 0.48445400  |
| C | 3.42152400  | -1.21638100 | -0.02097900 |
| C | 4.28268800  | -1.29671900 | -1.11086300 |
| C | 3.66854000  | -1.91047200 | 1.15614700  |
| C | 5.39554500  | -2.12852800 | -1.03184800 |
| H | 4.07189100  | -0.72882700 | -2.00908300 |
| C | 4.78631000  | -2.74124000 | 1.22451000  |
| H | 2.99345900  | -1.82259800 | 1.99625400  |
| C | 5.64684800  | -2.85451500 | 0.13379800  |
| H | 6.06535600  | -2.20946400 | -1.88041700 |
| H | 4.98226900  | -3.29739000 | 2.13420900  |
| H | 6.51417900  | -3.50256500 | 0.19244900  |
| C | -0.81572300 | 1.30859800  | -0.67118500 |
| C | -1.06740100 | 1.72236300  | -1.97706800 |
| C | -1.78968000 | 1.38608200  | 0.31684700  |
| C | -2.32765200 | 2.22335800  | -2.29470600 |
| H | -0.29090300 | 1.65573800  | -2.72919800 |
| C | -3.04738300 | 1.88738000  | -0.01159200 |
| H | -1.56886400 | 1.07409600  | 1.32835400  |
| C | -3.31567000 | 2.30825200  | -1.31311400 |
| H | -2.53374800 | 2.54773900  | -3.30817100 |
| H | -3.80908300 | 1.93935000  | 0.75677100  |
| H | -4.29463800 | 2.70100800  | -1.56464500 |
| C | 1.54946100  | 3.20642200  | -0.06384600 |
| C | 0.57435800  | 3.92442600  | 0.64030300  |
| C | 2.57017100  | 3.89758200  | -0.73323200 |
| C | 0.61888800  | 5.31590100  | 0.66449600  |
| H | -0.20487700 | 3.40522900  | 1.18174200  |
| C | 2.60644600  | 5.28827500  | -0.70599700 |
| H | 3.32553700  | 3.34239200  | -1.27615300 |
| C | 1.62994200  | 6.00012100  | -0.00945700 |
| H | -0.13582900 | 5.86465200  | 1.21621200  |
| H | 3.39568400  | 5.81457700  | -1.23066900 |
| H | 1.65815300  | 7.08390800  | 0.01019500  |
| N | 2.68689300  | 1.05332400  | 0.06372200  |

**TS4<sub>TPT</sub>**

|   |            |             |            |
|---|------------|-------------|------------|
| O | 5.17542500 | -0.63415600 | 2.34650100 |
| H | 5.10120900 | -1.12964200 | 3.17186800 |
| C | 2.80700300 | -0.05338600 | 2.57339300 |
| C | 1.97755600 | -0.07095500 | 3.65805300 |

|   |              |              |              |
|---|--------------|--------------|--------------|
| H | 2. 20538400  | 0. 32962400  | 4. 63462000  |
| C | 0. 77671700  | -0. 72595600 | 3. 24766500  |
| C | 0. 09173900  | -1. 88437700 | 1. 02375300  |
| C | 0. 94951400  | -1. 05961000 | 1. 93476300  |
| O | 2. 18269300  | -0. 65321500 | 1. 51379500  |
| O | -0. 76984400 | -2. 61007800 | 1. 60193200  |
| C | 4. 20068800  | 0. 42545200  | 2. 37956300  |
| H | 4. 43389500  | 1. 13711900  | 3. 17904000  |
| H | -0. 09393600 | -0. 94411700 | 3. 84521700  |
| H | 4. 30190500  | 0. 93897600  | 1. 42270200  |
| C | -2. 15189800 | 1. 42560100  | -0. 20892300 |
| C | -1. 00424100 | -0. 48099200 | 0. 11034500  |
| N | -2. 32434500 | -0. 68448400 | -0. 02795800 |
| N | -0. 88760600 | 0. 87888500  | -0. 00769300 |
| H | -0. 57009400 | -3. 80498400 | 0. 26738500  |
| C | 0. 89186900  | -2. 66831500 | -0. 11415900 |
| O | 0. 07789700  | -3. 77130100 | -0. 47135000 |
| C | 1. 34332900  | -1. 98686200 | -1. 36563200 |
| C | 0. 72941400  | -1. 70981500 | -2. 55408300 |
| O | 2. 67457800  | -1. 69386500 | -1. 46500900 |
| C | 1. 74209600  | -1. 21001500 | -3. 43121200 |
| H | -0. 31008500 | -1. 87166500 | -2. 78863800 |
| C | 2. 90919700  | -1. 21438500 | -2. 72621300 |
| H | 1. 62356900  | -0. 89687600 | -4. 45785700 |
| C | 4. 30193500  | -0. 84836100 | -3. 07883300 |
| H | 4. 99575300  | -1. 56808900 | -2. 63084800 |
| H | 4. 40657000  | -0. 89985600 | -4. 16787000 |
| O | 4. 60909200  | 0. 48383500  | -2. 61519200 |
| H | 5. 56395100  | 0. 60378400  | -2. 69074700 |
| H | 1. 79682600  | -3. 01979500 | 0. 40114900  |
| C | -3. 08672200 | -1. 90625900 | -0. 00810700 |
| C | -4. 04022500 | -2. 07556900 | 0. 99318600  |
| C | -2. 92785400 | -2. 84477700 | -1. 02041900 |
| C | -4. 83123900 | -3. 22034800 | 0. 99029100  |
| H | -4. 15004300 | -1. 32461900 | 1. 76612500  |
| C | -3. 72209500 | -3. 99093400 | -1. 01301400 |
| H | -2. 19332800 | -2. 68590100 | -1. 79789200 |
| C | -4. 67107500 | -4. 18090200 | -0. 01012300 |
| H | -5. 56937300 | -3. 36374800 | 1. 77120100  |
| H | -3. 60028900 | -4. 73033800 | -1. 79637800 |
| H | -5. 28778000 | -5. 07275000 | -0. 00923800 |
| C | 0. 32112500  | 1. 65918900  | 0. 12352300  |
| C | 0. 46804700  | 2. 49558200  | 1. 22798400  |
| C | 1. 28198400  | 1. 61574600  | -0. 88090500 |

|   |              |             |              |
|---|--------------|-------------|--------------|
| C | 1. 59356500  | 3. 31190100 | 1. 31612800  |
| H | -0. 28799300 | 2. 51205200 | 2. 00326000  |
| C | 2. 40921200  | 2. 42839000 | -0. 78020900 |
| H | 1. 14676900  | 0. 95963800 | -1. 73069800 |
| C | 2. 56120200  | 3. 28222300 | 0. 31179900  |
| H | 1. 71251000  | 3. 96842900 | 2. 17053900  |
| H | 3. 16801400  | 2. 37669400 | -1. 55149900 |
| H | 3. 43581700  | 3. 91935100 | 0. 38405800  |
| C | -2. 49667100 | 2. 84827000 | -0. 37838800 |
| C | -1. 74730700 | 3. 70148200 | -1. 19955200 |
| C | -3. 64476100 | 3. 33922400 | 0. 26019200  |
| C | -2. 14006900 | 5. 02637000 | -1. 37089900 |
| H | -0. 87052800 | 3. 33246900 | -1. 71593100 |
| C | -4. 02939900 | 4. 66564500 | 0. 08708000  |
| H | -4. 22828800 | 2. 68210700 | 0. 89356800  |
| C | -3. 27753000 | 5. 51270700 | -0. 72703500 |
| H | -1. 55768500 | 5. 67729700 | -2. 01313800 |
| H | -4. 91557700 | 5. 03695200 | 0. 58938000  |
| H | -3. 57756200 | 6. 54607500 | -0. 86096600 |
| N | -3. 04361600 | 0. 47506400 | -0. 22062000 |

### IM6<sub>TPT</sub>

|   |              |              |              |
|---|--------------|--------------|--------------|
| O | -5. 06377900 | -1. 24975600 | 3. 62406600  |
| H | -5. 23627700 | -0. 56595400 | 4. 28391600  |
| C | -3. 43067400 | 0. 16881800  | 2. 49901800  |
| C | -2. 78214400 | 1. 31255200  | 2. 88900400  |
| H | -2. 28597100 | 1. 46746300  | 3. 83459200  |
| C | -2. 89118900 | 2. 22956700  | 1. 81340500  |
| C | -4. 02502700 | 2. 01332500  | -0. 49203100 |
| C | -3. 59892100 | 1. 58814700  | 0. 82731100  |
| O | -3. 92802900 | 0. 32354100  | 1. 24596500  |
| O | -3. 83194500 | 3. 15064100  | -0. 90426700 |
| C | -3. 70071900 | -1. 12078300 | 3. 19479400  |
| H | -3. 01072800 | -1. 20961100 | 4. 03942500  |
| H | -2. 49870700 | 3. 23285200  | 1. 76030400  |
| H | -3. 52362400 | -1. 95815100 | 2. 51770200  |
| C | 3. 64555700  | -0. 12118300 | -0. 11119800 |
| C | 1. 95574200  | 1. 06817200  | 0. 82714700  |
| N | 2. 84165200  | 1. 82326300  | 0. 14326600  |
| N | 2. 48147600  | -0. 18554200 | 0. 65368600  |
| H | -4. 96176300 | 2. 57414600  | -2. 50519600 |
| C | -4. 73939900 | 1. 00254500  | -1. 40968200 |
| O | -5. 40044800 | 1. 70860900  | -2. 45238800 |
| C | -3. 75725800 | -0. 00425000 | -1. 93134400 |

|   |             |             |             |
|---|-------------|-------------|-------------|
| C | -2.47723400 | 0.08057900  | -2.39429100 |
| O | -4.20771600 | -1.28821000 | -2.05035400 |
| C | -2.11726200 | -1.23432900 | -2.82717100 |
| H | -1.86532700 | 0.96915500  | -2.42707100 |
| C | -3.19774200 | -2.03268400 | -2.59622300 |
| H | -1.17556400 | -1.54920500 | -3.25053700 |
| C | -3.45135400 | -3.47733600 | -2.81354600 |
| H | -4.43521500 | -3.61757100 | -3.27564300 |
| H | -2.69063900 | -3.86068500 | -3.50184900 |
| O | -3.39259800 | -4.17518600 | -1.55429300 |
| H | -3.74461600 | -5.06279600 | -1.69511100 |
| H | -5.49819600 | 0.46800700  | -0.83206800 |
| C | 2.80310800  | 3.24299100  | -0.01600300 |
| C | 3.98839800  | 3.94195300  | -0.25152900 |
| C | 1.58485700  | 3.92107100  | 0.06074900  |
| C | 3.94951500  | 5.32601100  | -0.40758300 |
| H | 4.92682900  | 3.40700000  | -0.30982900 |
| C | 1.56146100  | 5.30569700  | -0.08756100 |
| H | 0.66924800  | 3.37057900  | 0.22977300  |
| C | 2.73970400  | 6.01394300  | -0.32430800 |
| H | 4.87209700  | 5.86568200  | -0.59026500 |
| H | 0.61364500  | 5.82904000  | -0.02861600 |
| H | 2.71425800  | 7.09096200  | -0.44557700 |
| C | 1.92580200  | -1.36024800 | 1.27335800  |
| C | 2.64765500  | -2.02280700 | 2.26435400  |
| C | 0.66687100  | -1.81176900 | 0.88306900  |
| C | 2.10358100  | -3.15768200 | 2.86325800  |
| H | 3.62012700  | -1.65153900 | 2.56586700  |
| C | 0.12784400  | -2.94428000 | 1.49073400  |
| H | 0.11839600  | -1.28382000 | 0.11251500  |
| C | 0.84530700  | -3.62013100 | 2.47781800  |
| H | 2.66173700  | -3.67458900 | 3.63568900  |
| H | -0.85098400 | -3.29784000 | 1.18717400  |
| H | 0.42420600  | -4.50245800 | 2.94676300  |
| C | 4.50663300  | -1.24020400 | -0.52975500 |
| C | 3.97324900  | -2.46907900 | -0.94246300 |
| C | 5.89658400  | -1.05191000 | -0.55849900 |
| C | 4.81826300  | -3.48992600 | -1.37094700 |
| H | 2.90211500  | -2.62616700 | -0.94630500 |
| C | 6.73562900  | -2.07681100 | -0.98537900 |
| H | 6.31386700  | -0.10415800 | -0.24054400 |
| C | 6.19948400  | -3.29933900 | -1.39086600 |
| H | 4.39446300  | -4.43395700 | -1.69450800 |
| H | 7.80847000  | -1.92060800 | -0.99865900 |

|   |            |             |             |
|---|------------|-------------|-------------|
| H | 6.85409000 | -4.09774800 | -1.72233400 |
| N | 3.88291100 | 1.11958600  | -0.43427600 |

**IM1<sub>1fBu</sub>**

|   |             |             |             |
|---|-------------|-------------|-------------|
| O | 4.89155400  | 1.98376600  | -1.07376900 |
| H | 4.43511500  | 1.80015000  | -1.90484800 |
| C | 4.92643700  | -0.39595700 | -0.53185900 |
| C | 4.77879500  | -1.53562000 | -1.27947800 |
| H | 5.26177300  | -1.74129100 | -2.22231200 |
| C | 3.87751900  | -2.36896800 | -0.56690400 |
| C | 2.65053000  | -2.05893400 | 1.65617300  |
| H | 2.19155400  | -3.05459200 | 1.51138200  |
| C | 3.53298800  | -1.68288600 | 0.57233200  |
| O | 4.17612400  | -0.47616600 | 0.59675700  |
| O | 2.40797500  | -1.38707200 | 2.64484600  |
| C | 5.71129900  | 0.85108300  | -0.75493800 |
| H | 6.44436400  | 0.65934600  | -1.54498500 |
| H | 3.52102500  | -3.34893100 | -0.84661500 |
| H | 6.25131800  | 1.12467800  | 0.15356000  |
| C | -3.22635300 | 1.74180600  | 0.88339100  |
| C | -4.16938900 | 0.78800000  | 0.70686200  |
| C | -2.31762300 | 0.13361300  | -0.45950000 |
| N | -2.10698400 | 1.32903400  | 0.16612400  |
| H | -3.26884900 | 2.65661200  | 1.44964500  |
| H | -5.17327000 | 0.73119300  | 1.09216300  |
| N | -3.60047200 | -0.18237900 | -0.11353700 |
| C | -0.83973200 | 2.12540000  | 0.13793200  |
| C | -4.34263200 | -1.41502500 | -0.52304300 |
| C | -5.62337900 | -0.99238000 | -1.26386600 |
| H | -5.37956800 | -0.39737700 | -2.14844000 |
| H | -6.17369300 | -1.87942500 | -1.58824600 |
| H | -6.28708200 | -0.40274900 | -0.62677600 |
| C | -3.48390300 | -2.27904400 | -1.44996600 |
| H | -2.56360200 | -2.60532800 | -0.96357400 |
| H | -4.06146200 | -3.16628100 | -1.72422000 |
| H | -3.21629700 | -1.74956200 | -2.36573700 |
| C | -4.69232900 | -2.21424600 | 0.74468300  |
| H | -3.78398300 | -2.50135500 | 1.28146400  |
| H | -5.32422800 | -1.63723900 | 1.42451700  |
| H | -5.23458600 | -3.12465600 | 0.47537900  |
| C | 0.20138900  | 1.45299300  | -0.76074200 |
| H | -0.14831400 | 1.36412700  | -1.79081600 |
| H | 1.10583000  | 2.06758100  | -0.75543700 |
| H | 0.46545000  | 0.45777700  | -0.40066500 |

|   |             |            |             |
|---|-------------|------------|-------------|
| C | -0.29337900 | 2.21861800 | 1.57296000  |
| H | 0.64112300  | 2.78560700 | 1.58158700  |
| H | -0.99733300 | 2.72214700 | 2.24047000  |
| H | -0.09254800 | 1.22175200 | 1.97411000  |
| C | -1.15493600 | 3.52790200 | -0.41056700 |
| H | -0.23667000 | 4.11836400 | -0.46727500 |
| H | -1.58306400 | 3.46298800 | -1.41485800 |
| H | -1.85785800 | 4.06751500 | 0.22893800  |

**TS1<sub>17</sub>Bu**

|   |             |             |             |
|---|-------------|-------------|-------------|
| O | 5.08332400  | 0.41601400  | -0.20974400 |
| H | 4.92809300  | 0.46213400  | -1.16144300 |
| C | 3.38759100  | -1.35548000 | -0.09537300 |
| C | 2.87288500  | -2.20061300 | -1.03595300 |
| H | 3.44072100  | -2.75419000 | -1.76911700 |
| C | 1.45694300  | -2.21540900 | -0.83928800 |
| C | -0.07336800 | -1.06683500 | 0.95382200  |
| H | -0.77836100 | -1.87227400 | 0.71253500  |
| C | 1.19606000  | -1.36860900 | 0.20240700  |
| O | 2.36971800  | -0.84895000 | 0.66657000  |
| O | -0.00804900 | -0.64378100 | 2.14522500  |
| C | 4.77463300  | -0.92369600 | 0.21951800  |
| H | 5.46931100  | -1.63981100 | -0.23264500 |
| H | 0.72643700  | -2.78264500 | -1.39558300 |
| H | 4.94130300  | -0.92401600 | 1.29871000  |
| C | -2.14463400 | 2.28139700  | -0.04065500 |
| C | -3.12096500 | 1.34835800  | -0.05415500 |
| C | -1.14176700 | 0.25896300  | -0.03075100 |
| N | -0.93253000 | 1.61000000  | -0.04459900 |
| H | -2.23001400 | 3.35172000  | -0.04960500 |
| H | -4.18580100 | 1.48285000  | -0.07262100 |
| N | -2.50174700 | 0.10702300  | -0.06798000 |
| C | 0.39731500  | 2.32257200  | -0.13973300 |
| C | -3.28307400 | -1.18477300 | -0.16816700 |
| C | -4.70129400 | -0.88002800 | -0.68253100 |
| H | -4.68271100 | -0.34776500 | -1.63667000 |
| H | -5.21557000 | -1.83055000 | -0.83904800 |
| H | -5.29305000 | -0.30705100 | 0.03423800  |
| C | -2.61148700 | -2.10807400 | -1.19611100 |
| H | -1.59852000 | -2.39280600 | -0.91811100 |
| H | -3.20108000 | -3.02333400 | -1.29098200 |
| H | -2.57390000 | -1.62333700 | -2.17529400 |
| C | -3.40278800 | -1.82901500 | 1.22344600  |
| H | -2.43782800 | -2.09448400 | 1.65348900  |



|   |             |             |             |
|---|-------------|-------------|-------------|
| H | -3.90249000 | -1.14560500 | 1.91503600  |
| H | -4.00450100 | -2.73889700 | 1.15136900  |
| C | 1.20227600  | 1.69404600  | -1.28582700 |
| H | 0.67519800  | 1.82333100  | -2.23558600 |
| H | 2.17212700  | 2.19131900  | -1.36168200 |
| H | 1.37370400  | 0.63130300  | -1.13557800 |
| C | 1.12056800  | 2.23962100  | 1.21123300  |
| H | 2.10277300  | 2.71272300  | 1.12599900  |
| H | 0.54908200  | 2.77699000  | 1.97414200  |
| H | 1.24740800  | 1.21392200  | 1.55070800  |
| C | 0.16435900  | 3.80198300  | -0.48431100 |
| H | 1.14155300  | 4.27418600  | -0.60548200 |
| H | -0.38488600 | 3.92599500  | -1.42105700 |
| H | -0.35851100 | 4.33841600  | 0.31048000  |

**IM2<sub>ttBu</sub>**

|   |             |             |             |
|---|-------------|-------------|-------------|
| O | 5.11489100  | 0.09704500  | 0.04020100  |
| H | 5.04084000  | 0.28927200  | -0.90390300 |
| C | 3.23015200  | -1.46179500 | -0.17635500 |
| C | 2.67373800  | -2.12027000 | -1.23365600 |
| H | 3.21335900  | -2.64766700 | -2.00663100 |
| C | 1.25533900  | -1.99092000 | -1.09346600 |
| C | -0.25146700 | -0.87352700 | 0.78197100  |
| H | -0.87373200 | -1.75294200 | 0.54823400  |
| C | 1.03441200  | -1.24620200 | 0.03302000  |
| O | 2.23364300  | -0.92999200 | 0.60158600  |
| O | -0.12140400 | -0.64142400 | 2.09570700  |
| C | 4.63547100  | -1.24501900 | 0.25455300  |
| H | 5.27158800  | -1.96615100 | -0.26949700 |
| H | 0.49721400  | -2.40187600 | -1.74298000 |
| H | 4.73883300  | -1.41686200 | 1.32800200  |
| C | -1.92557500 | 2.24064400  | -0.52853500 |
| C | -2.93532800 | 1.34635200  | -0.54832000 |
| C | -1.08600400 | 0.26994300  | 0.10323700  |
| N | -0.77845700 | 1.58263900  | -0.12136400 |
| H | -1.94691600 | 3.28389700  | -0.77605200 |
| H | -3.96392800 | 1.49575800  | -0.81242400 |
| N | -2.41996400 | 0.12433300  | -0.15699500 |
| C | 0.56407100  | 2.30575000  | -0.03646800 |
| C | -3.29653900 | -1.12078600 | -0.03096200 |
| C | -4.73845600 | -0.75561700 | -0.42203900 |
| H | -4.81989100 | -0.43936800 | -1.46455000 |
| H | -5.34601900 | -1.65404900 | -0.30043900 |
| H | -5.16199200 | 0.01583000  | 0.22413200  |

|   |             |             |             |
|---|-------------|-------------|-------------|
| C | -2.81604100 | -2.20131500 | -1.01552000 |
| H | -1.85432200 | -2.63461400 | -0.74538200 |
| H | -3.54880900 | -3.01164400 | -1.03160400 |
| H | -2.74184100 | -1.79102800 | -2.02609400 |
| C | -3.31150700 | -1.59252600 | 1.43270300  |
| H | -2.31859100 | -1.77358700 | 1.84153400  |
| H | -3.79397100 | -0.83946200 | 2.06184800  |
| H | -3.89565700 | -2.51407000 | 1.49839600  |
| C | 1.45164600  | 1.82675300  | -1.19453900 |
| H | 0.96220400  | 2.02304700  | -2.15275500 |
| H | 2.39352200  | 2.38011800  | -1.17304600 |
| H | 1.67954900  | 0.76558800  | -1.13901300 |
| C | 1.19007000  | 2.08309700  | 1.34562300  |
| H | 2.20565100  | 2.48699600  | 1.33744900  |
| H | 0.61422300  | 2.62268500  | 2.10355300  |
| H | 1.21390900  | 1.03616100  | 1.64057500  |
| C | 0.33766500  | 3.81630200  | -0.21190800 |
| H | 1.30428400  | 4.30508300  | -0.07422200 |
| H | -0.02091500 | 4.07910900  | -1.20981100 |
| H | -0.34656900 | 4.22075700  | 0.53721200  |

**IM5<sub>1tBu</sub>**

|   |             |             |             |
|---|-------------|-------------|-------------|
| O | -5.82094400 | -0.92465400 | -1.72396700 |
| H | -6.07739000 | -0.00564400 | -1.57561100 |
| C | -4.19654600 | -0.61086400 | 0.08912700  |
| C | -4.12495600 | 0.19722200  | 1.18489100  |
| H | -4.92585300 | 0.38727700  | 1.88417500  |
| C | -2.79615300 | 0.72857700  | 1.21980200  |
| C | -0.80154600 | 0.56478300  | -0.51569700 |
| C | -2.13625000 | 0.20870000  | 0.14251800  |
| O | -2.98362300 | -0.60500800 | -0.55414200 |
| O | -1.00522500 | 1.68179300  | -1.23528900 |
| C | -5.28691100 | -1.43679300 | -0.48958400 |
| H | -6.07823900 | -1.53034100 | 0.26279500  |
| H | -2.39787400 | 1.42258200  | 1.94289300  |
| H | -4.92933900 | -2.44040100 | -0.73089000 |
| C | 1.99535500  | 1.56404700  | 1.77340400  |
| C | 1.76288000  | 0.32306800  | 2.23070600  |
| C | 0.29556800  | 0.72227000  | 0.59492800  |
| N | 1.08818600  | 1.83426500  | 0.76843600  |
| H | 2.74035500  | 2.25956300  | 2.10016500  |
| H | 2.26806100  | -0.20432100 | 3.01502600  |
| N | 0.71140200  | -0.21478200 | 1.51626600  |
| C | 0.18472800  | -1.57346800 | 2.05939300  |

|                          |             |             |             |
|--------------------------|-------------|-------------|-------------|
| H                        | -1.12801700 | 0.80681600  | -2.57057400 |
| C                        | -0.35040000 | -0.59576400 | -1.63056100 |
| O                        | -0.92956400 | -0.14808300 | -2.82568400 |
| C                        | 1.12762500  | -0.75534800 | -1.84321500 |
| C                        | 1.98797800  | -0.18102800 | -2.73282800 |
| O                        | 1.80109000  | -1.69448700 | -1.10319700 |
| C                        | 3.26507300  | -0.79297400 | -2.52544300 |
| H                        | 1.73193800  | 0.56763700  | -3.46421400 |
| C                        | 3.10885700  | -1.70752400 | -1.52908900 |
| H                        | 4.18241800  | -0.59070500 | -3.05828700 |
| C                        | 4.03567300  | -2.67587400 | -0.89948000 |
| H                        | 3.54968700  | -3.65399800 | -0.80162200 |
| H                        | 4.90516700  | -2.78949900 | -1.55501800 |
| O                        | 4.44955900  | -2.20493400 | 0.40168900  |
| H                        | 5.02205800  | -2.88166500 | 0.78473400  |
| H                        | -0.77563900 | -1.55677400 | -1.34869300 |
| C                        | 1.07014900  | 3.26571600  | 0.16421400  |
| C                        | -0.29382400 | 3.90887000  | 0.44830500  |
| H                        | -0.48865500 | 3.92430200  | 1.52524900  |
| H                        | -0.26943500 | 4.94503200  | 0.09894100  |
| H                        | -1.08514600 | 3.37316200  | -0.06928200 |
| C                        | 2.13588700  | 4.12426600  | 0.87263800  |
| H                        | 3.15304300  | 3.75881300  | 0.71543800  |
| H                        | 2.07853000  | 5.11840400  | 0.42569800  |
| H                        | 1.95048300  | 4.23914300  | 1.94293900  |
| C                        | 1.44003100  | 3.22279200  | -1.32206000 |
| H                        | 2.43938600  | 2.79873700  | -1.45266700 |
| H                        | 0.71037800  | 2.64521200  | -1.88105900 |
| H                        | 1.45859600  | 4.24844100  | -1.70244300 |
| C                        | 1.40918800  | -2.42353500 | 2.46171500  |
| H                        | 1.88175700  | -2.08425200 | 3.38439000  |
| H                        | 1.06286200  | -3.44286900 | 2.64232400  |
| H                        | 2.15832300  | -2.44931900 | 1.66893400  |
| C                        | -0.66245200 | -1.25320700 | 3.30036100  |
| H                        | -1.57448500 | -0.71923200 | 3.03276600  |
| H                        | -0.94498400 | -2.19053500 | 3.78662200  |
| H                        | -0.10165200 | -0.65449800 | 4.02196000  |
| C                        | -0.62378600 | -2.41009800 | 1.07101400  |
| H                        | -1.53012300 | -1.92283200 | 0.73140300  |
| H                        | -0.02115300 | -2.72171300 | 0.22050800  |
| H                        | -0.92952400 | -3.31293400 | 1.60484600  |
| <b>TS4<sub>t</sub>Bu</b> |             |             |             |
| O                        | -4.16567300 | 3.13753400  | -1.55538300 |

|   |             |             |             |
|---|-------------|-------------|-------------|
| H | -3.78711700 | 3.73917600  | -2.20904500 |
| C | -1.97037300 | 3.06390600  | -0.46892600 |
| C | -0.88916700 | 3.89657800  | -0.48539900 |
| H | -0.91594900 | 4.96922400  | -0.36334100 |
| C | 0.26047100  | 3.07810100  | -0.70364400 |
| C | 0.55852500  | 0.53803800  | -1.22011500 |
| C | -0.18505600 | 1.79046200  | -0.79811700 |
| O | -1.54648900 | 1.77301700  | -0.65805100 |
| O | 1.50241000  | 0.81796000  | -2.03548800 |
| C | -3.43109800 | 3.30070800  | -0.32902000 |
| H | -3.57652600 | 4.30761700  | 0.07714700  |
| H | 1.28505000  | 3.39932000  | -0.80013400 |
| H | -3.87505300 | 2.58645800  | 0.36743500  |
| C | 3.33036100  | 0.52964700  | 1.62772700  |
| C | 2.27625900  | 0.79638700  | 2.42125100  |
| C | 1.46435800  | 0.03179800  | 0.45361200  |
| N | 2.84252900  | 0.02390800  | 0.43595000  |
| H | 4.37808800  | 0.63662800  | 1.83446700  |
| H | 2.25701000  | 1.17566000  | 3.42610700  |
| N | 1.13304600  | 0.45215900  | 1.72118600  |
| C | -0.17816000 | 0.42537200  | 2.49223600  |
| H | 0.94136900  | -0.37093700 | -3.13292200 |
| C | -0.41551700 | -0.60874600 | -1.83844700 |
| O | 0.21372800  | -1.03173100 | -3.04214300 |
| C | -0.83154700 | -1.82158200 | -1.07177300 |
| C | -0.20198000 | -2.94325400 | -0.61590100 |
| O | -2.18165600 | -1.95187800 | -0.87175000 |
| C | -1.21787700 | -3.80248000 | -0.09237700 |
| H | 0.85480900  | -3.14366400 | -0.66020800 |
| C | -2.40646000 | -3.15736000 | -0.26503000 |
| H | -1.08605500 | -4.77766200 | 0.35235800  |
| C | -3.80989100 | -3.53288900 | 0.02959600  |
| H | -4.44347600 | -3.30995700 | -0.83657800 |
| H | -3.84320000 | -4.61266000 | 0.21075000  |
| O | -4.29213800 | -2.81623900 | 1.18459600  |
| H | -5.24843500 | -2.93992800 | 1.22411800  |
| H | -1.34012200 | -0.07790500 | -2.08480100 |
| C | 3.84079600  | -0.55469900 | -0.56349100 |
| C | 4.41480100  | 0.57332200  | -1.43293900 |
| H | 4.86234000  | 1.34978600  | -0.80503700 |
| H | 5.20349300  | 0.16735200  | -2.07276300 |
| H | 3.64059900  | 1.02006200  | -2.05138300 |
| C | 4.99581900  | -1.20517000 | 0.23119000  |
| H | 4.62480800  | -1.90287300 | 0.98626600  |

|   |             |             |             |
|---|-------------|-------------|-------------|
| H | 5.60953800  | -1.76899900 | -0.47488600 |
| H | 5.65093100  | -0.47677100 | 0.71240300  |
| C | 3.19759400  | -1.66830600 | -1.38917600 |
| H | 2.94243900  | -2.51879200 | -0.75240100 |
| H | 2.31558700  | -1.33721800 | -1.92271000 |
| H | 3.92724200  | -2.01625800 | -2.12530800 |
| C | 0.07774100  | -0.31972200 | 3.82056900  |
| H | 0.73106900  | 0.22936000  | 4.50052500  |
| H | -0.87958800 | -0.45763700 | 4.32867100  |
| H | 0.50998700  | -1.30689900 | 3.63875600  |
| C | -0.61210700 | 1.86822400  | 2.78314700  |
| H | -0.83934100 | 2.41508000  | 1.86867800  |
| H | -1.51032700 | 1.85662600  | 3.40606900  |
| H | 0.16323700  | 2.41646200  | 3.32433400  |
| C | -1.26193200 | -0.34407900 | 1.74826700  |
| H | -1.52375400 | 0.10162500  | 0.79667900  |
| H | -0.97030000 | -1.38260500 | 1.59639500  |
| H | -2.16219800 | -0.33699200 | 2.36671000  |

**IM6<sub>1tBu</sub>**

|   |             |             |             |
|---|-------------|-------------|-------------|
| O | 2.83434800  | -0.41215900 | 4.26186800  |
| H | 3.23817900  | -1.17549000 | 4.69422200  |
| C | 2.68119800  | -1.60657700 | 2.14133800  |
| C | 2.78285700  | -2.93401200 | 1.81086000  |
| H | 2.29176300  | -3.75092700 | 2.31672300  |
| C | 3.64798300  | -3.01002800 | 0.69006700  |
| C | 4.88612600  | -1.17081200 | -0.62569100 |
| C | 4.02153900  | -1.72082700 | 0.40104500  |
| O | 3.42844200  | -0.86027200 | 1.28958000  |
| O | 5.49483800  | -1.88382800 | -1.41409100 |
| C | 1.95882400  | -0.89410400 | 3.23292900  |
| H | 1.20095800  | -1.56853300 | 3.64305100  |
| H | 3.95898500  | -3.89397100 | 0.15543800  |
| H | 1.45354300  | -0.01220700 | 2.83586900  |
| C | -4.75007200 | -0.14595800 | -1.75902600 |
| C | -4.79933000 | 1.03791500  | -1.10603200 |
| C | -4.18679400 | -0.54916200 | 0.41664800  |
| N | -4.37500600 | -1.10052000 | -0.81774600 |
| H | -4.94571000 | -0.37226800 | -2.79340700 |
| H | -5.04715500 | 2.01878000  | -1.47425000 |
| N | -4.45215900 | 0.77488900  | 0.21610800  |
| C | -4.41940100 | 1.84458400  | 1.26161200  |
| H | 6.35459900  | -0.15477500 | -2.05138700 |
| C | 5.04261700  | 0.35780200  | -0.73438000 |

|   |             |             |             |
|---|-------------|-------------|-------------|
| O | 6.17633300  | 0.65276400  | -1.54075000 |
| C | 3.78260900  | 0.97067100  | -1.26823400 |
| C | 2.88713600  | 0.60104400  | -2.22796100 |
| O | 3.43371300  | 2.18638700  | -0.75387300 |
| C | 1.92485400  | 1.65605800  | -2.30905000 |
| H | 2.90814400  | -0.30995300 | -2.80655100 |
| C | 2.29610200  | 2.59584400  | -1.39434500 |
| H | 1.06288900  | 1.70744000  | -2.95668000 |
| C | 1.71506300  | 3.89945900  | -0.99265100 |
| H | 2.50256600  | 4.66068900  | -0.94525100 |
| H | 0.99045100  | 4.20139600  | -1.75627300 |
| O | 1.07566800  | 3.76984500  | 0.29113700  |
| H | 0.87179400  | 4.65834200  | 0.60798500  |
| H | 5.22154200  | 0.76828500  | 0.26339200  |
| C | -4.21444700 | -2.54677600 | -1.16371300 |
| C | -3.77987900 | -3.34653100 | 0.06754800  |
| H | -4.51792100 | -3.28888800 | 0.86907000  |
| H | -3.67021900 | -4.39463000 | -0.22460000 |
| H | -2.82353300 | -2.99723900 | 0.46023500  |
| C | -5.56566600 | -3.07829000 | -1.67276400 |
| H | -5.89829000 | -2.54320300 | -2.56575900 |
| H | -5.47753000 | -4.13702500 | -1.93063800 |
| H | -6.33584900 | -2.97574600 | -0.90327100 |
| C | -3.14144100 | -2.67095400 | -2.25961400 |
| H | -3.43712000 | -2.15531200 | -3.17677900 |
| H | -2.19154000 | -2.25040600 | -1.91830800 |
| H | -2.98171100 | -3.72414800 | -2.50548000 |
| C | -3.46993700 | 2.95968600  | 0.79037300  |
| H | -3.81547700 | 3.41939000  | -0.13885700 |
| H | -3.41481500 | 3.74463100  | 1.54901400  |
| H | -2.46242800 | 2.56757400  | 0.62753800  |
| C | -5.84540300 | 2.39464000  | 1.43751900  |
| H | -6.53007700 | 1.59996200  | 1.74600800  |
| H | -5.85282700 | 3.17268100  | 2.20555900  |
| H | -6.22388900 | 2.83419600  | 0.51088900  |
| C | -3.92059100 | 1.28069900  | 2.59519600  |
| H | -4.57409000 | 0.49426800  | 2.97470800  |
| H | -2.91117700 | 0.87395500  | 2.51263600  |
| H | -3.90430700 | 2.09443100  | 3.32560400  |
